# Supplementary material for: Discriminating role of bases in diketonate copper(i)-catalyzed C–O couplings: phenol versus diarylether
Source: Royal Society of Chemistry journal article supplement (doi:10.1039/c3dt32948h), 2013-01-01
Supplement: c3dt32948h.pdf [file c3dt32948h.pdf]

## Supporting Information

**General:**  $^1\text{H-NMR}$  spectra were recorded on a Bruker spectrometer (300 MHz) with TMS as an external reference. ESI/MS spectra were recorded on an API 3000 spectrometer at ENSCP-Paristech. All experiments were performed under argon using Schlenk techniques.

5

**Chemicals.** DMF was distilled from calcium hydride under vacuum and kept under argon. Iodobenzene, phenol, 2,2,6,6-tetramethyl-3,5-heptadione (TMHD), PhONa, CsOH $\cdot$ H $_2$ O, Cs $_2$ CO $_3$  and CuI were commercially available and used as received.

### 10 I. Characterization of $[(\text{ket}')\text{Cu-OH}]^-$

#### a) By $^1\text{H NMR}$ .

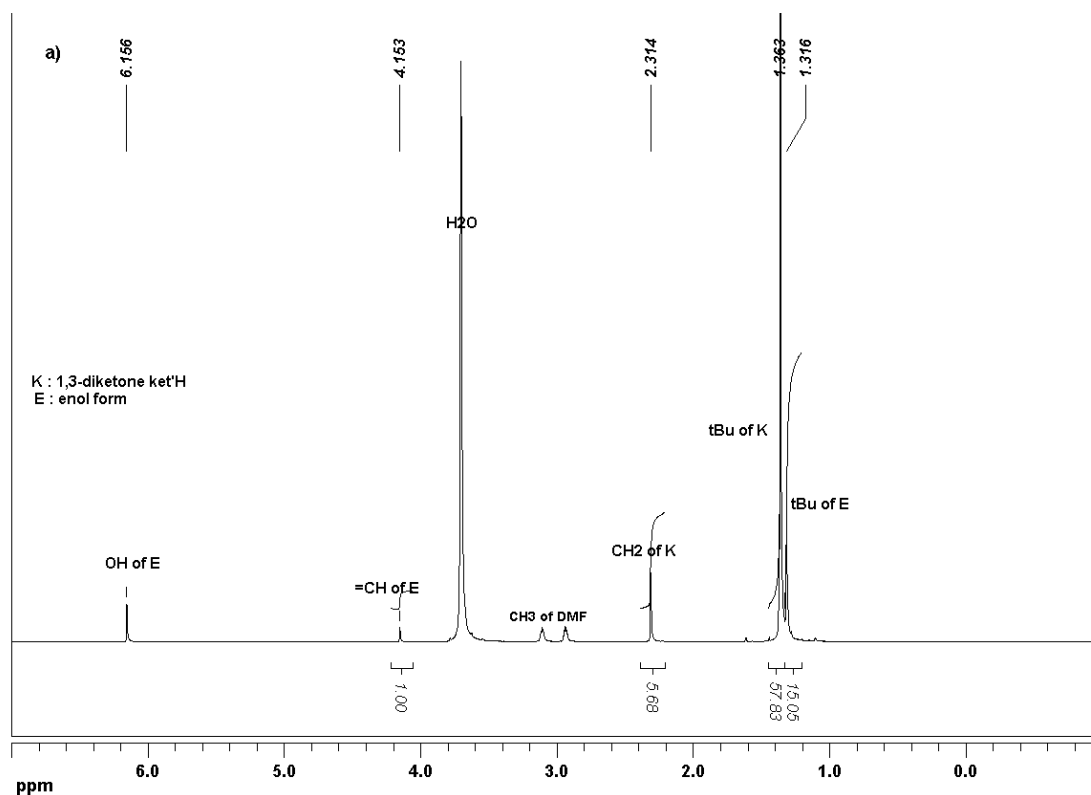

15

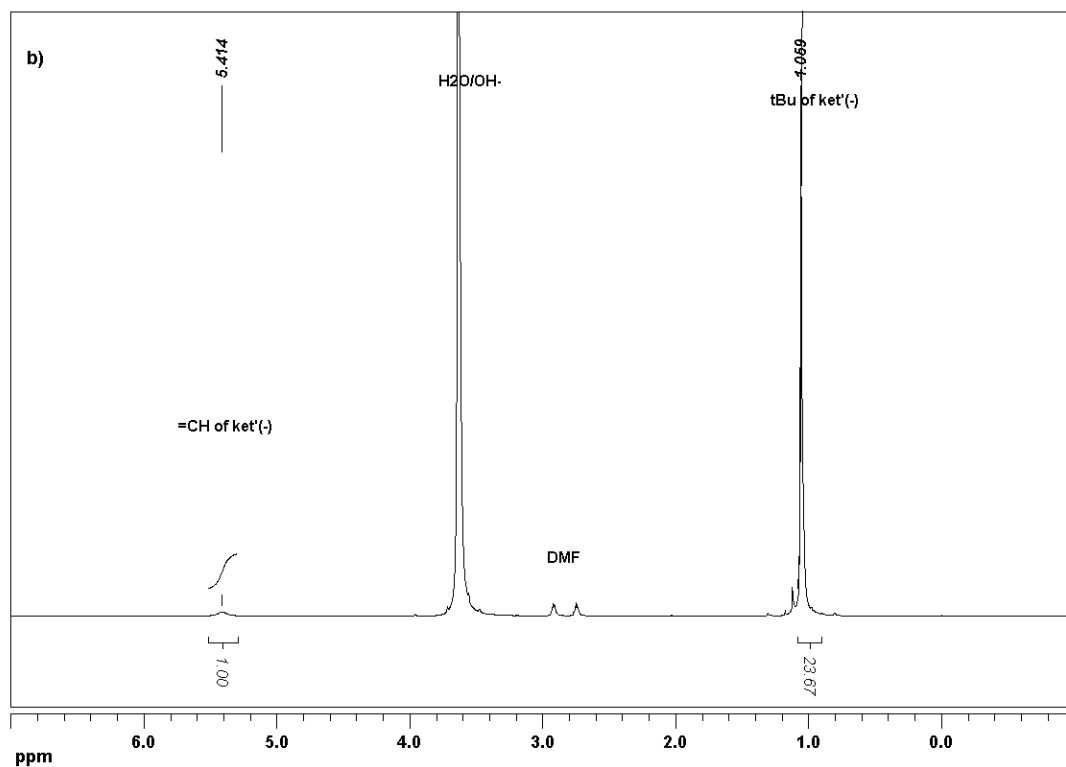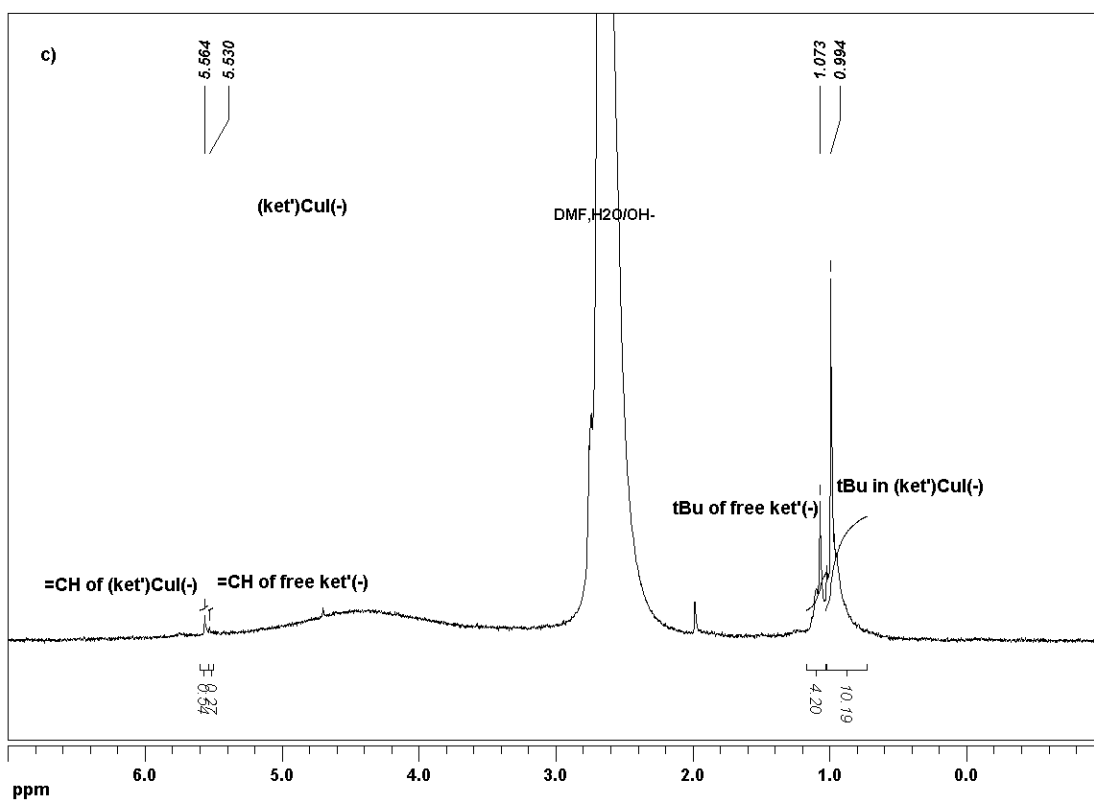

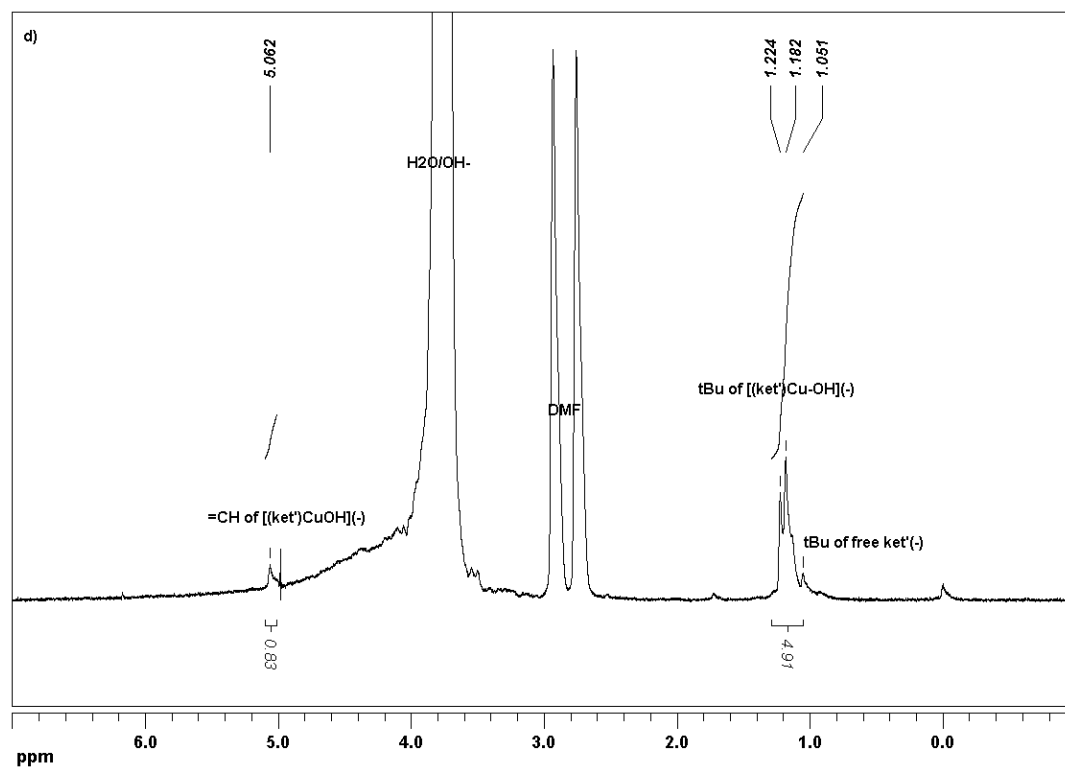

Figure S1.  $^1\text{H}$  NMR (300 MHz, TMS) in 0.5 mL of  $\text{DMF-}d_7$  of a) 2,2,6,6-tetramethyl-3,5-heptanedione ( $\text{ket}'\text{H}$ ) ( $10^{-2}$  M). b) ( $\text{ket}'\text{H}$ ) ( $10^{-2}$  M) +  $\text{CsOH}\cdot\text{H}_2\text{O}$  ( $10^{-2}$  M). c) ( $\text{ket}'\text{H}$ ) ( $10^{-2}$  M),  $\text{CsOH}\cdot\text{H}_2\text{O}$  ( $10^{-2}$  M) and  $\text{CuI}$  ( $10^{-2}$  M). d)  $\{(\text{ket}'\text{H})$  ( $10^{-2}$  M),  $\text{CsOH}\cdot\text{H}_2\text{O}$  ( $10^{-2}$  M),  $\text{CuI}$  ( $10^{-2}$  M) $\}$  and  $5$   $\text{CsOH}\cdot\text{H}_2\text{O}$  ( $10^{-2}$  M).

b) By ESI-MS

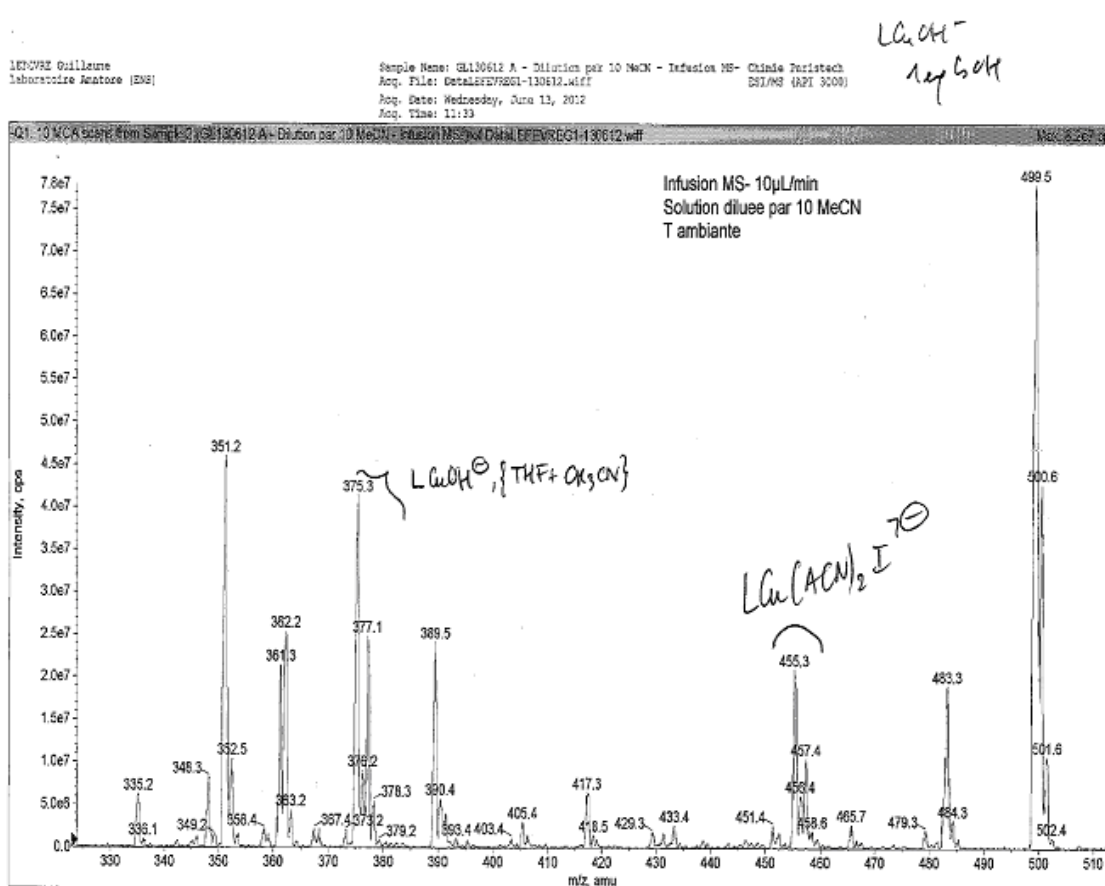

- 5 ESI(-) mass spectrum of complexes formed in the reaction of  $\text{CsOH}\cdot\text{H}_2\text{O}$  ( $3\cdot 10^{-2}$  M) with  $\text{ket}'\text{H}$ ,  $\text{CsOH}\cdot\text{H}_2\text{O}$  and  $\text{CuI}$  (all  $3\cdot 10^{-2}$  M) in 2 mL of THF after stirring during 1 h:  $[(\text{ket}')\text{Cu}-\text{OH}]^-$ ,  $\text{THF}, \text{CH}_3\text{CN}$  and  $[(\text{ket}')\text{CuI}]^-, 2\text{CH}_3\text{CN}$ . The mass peak of  $\text{ket}'^-$  appeared at 182.6 (L =  $\text{ket}'$ , ACN = acetonitrile)

## II. Characterization of [(ket')Cu-OPh]<sup>-</sup>

a) by <sup>1</sup>H NMR

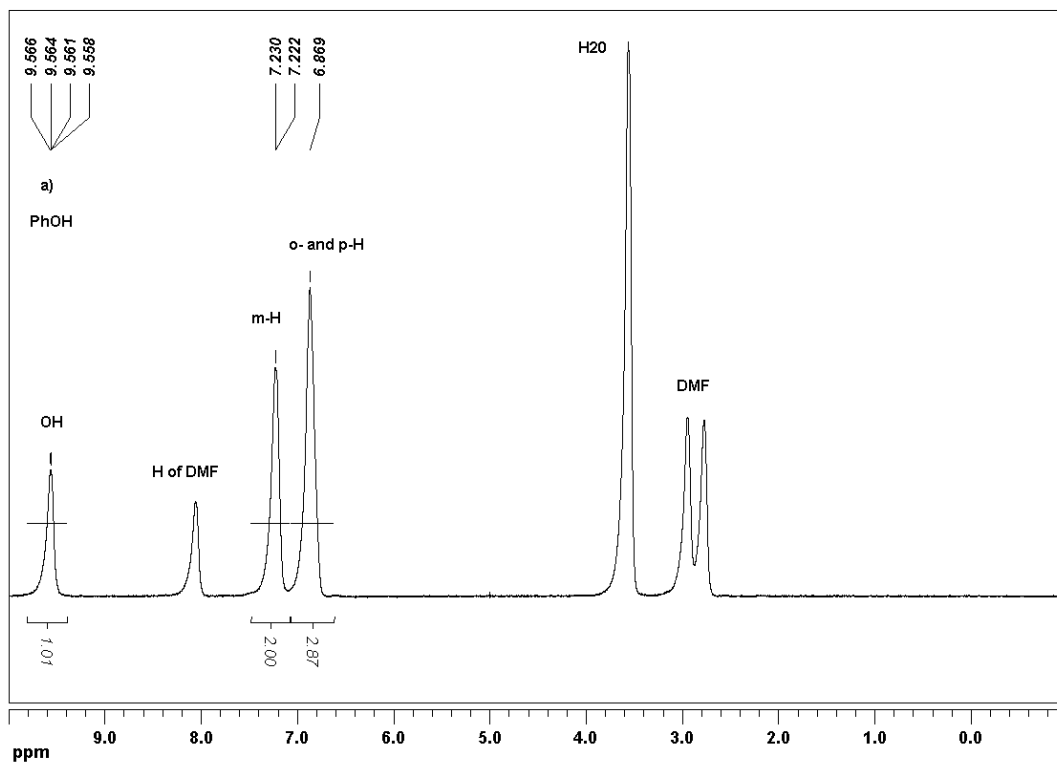

5

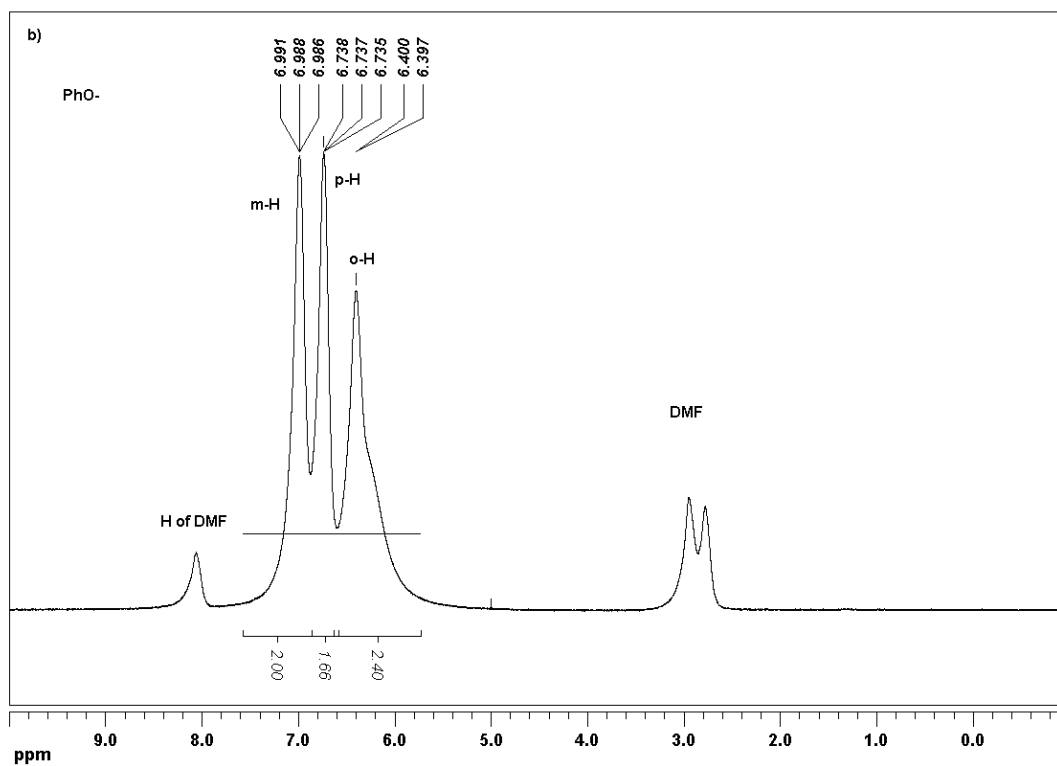

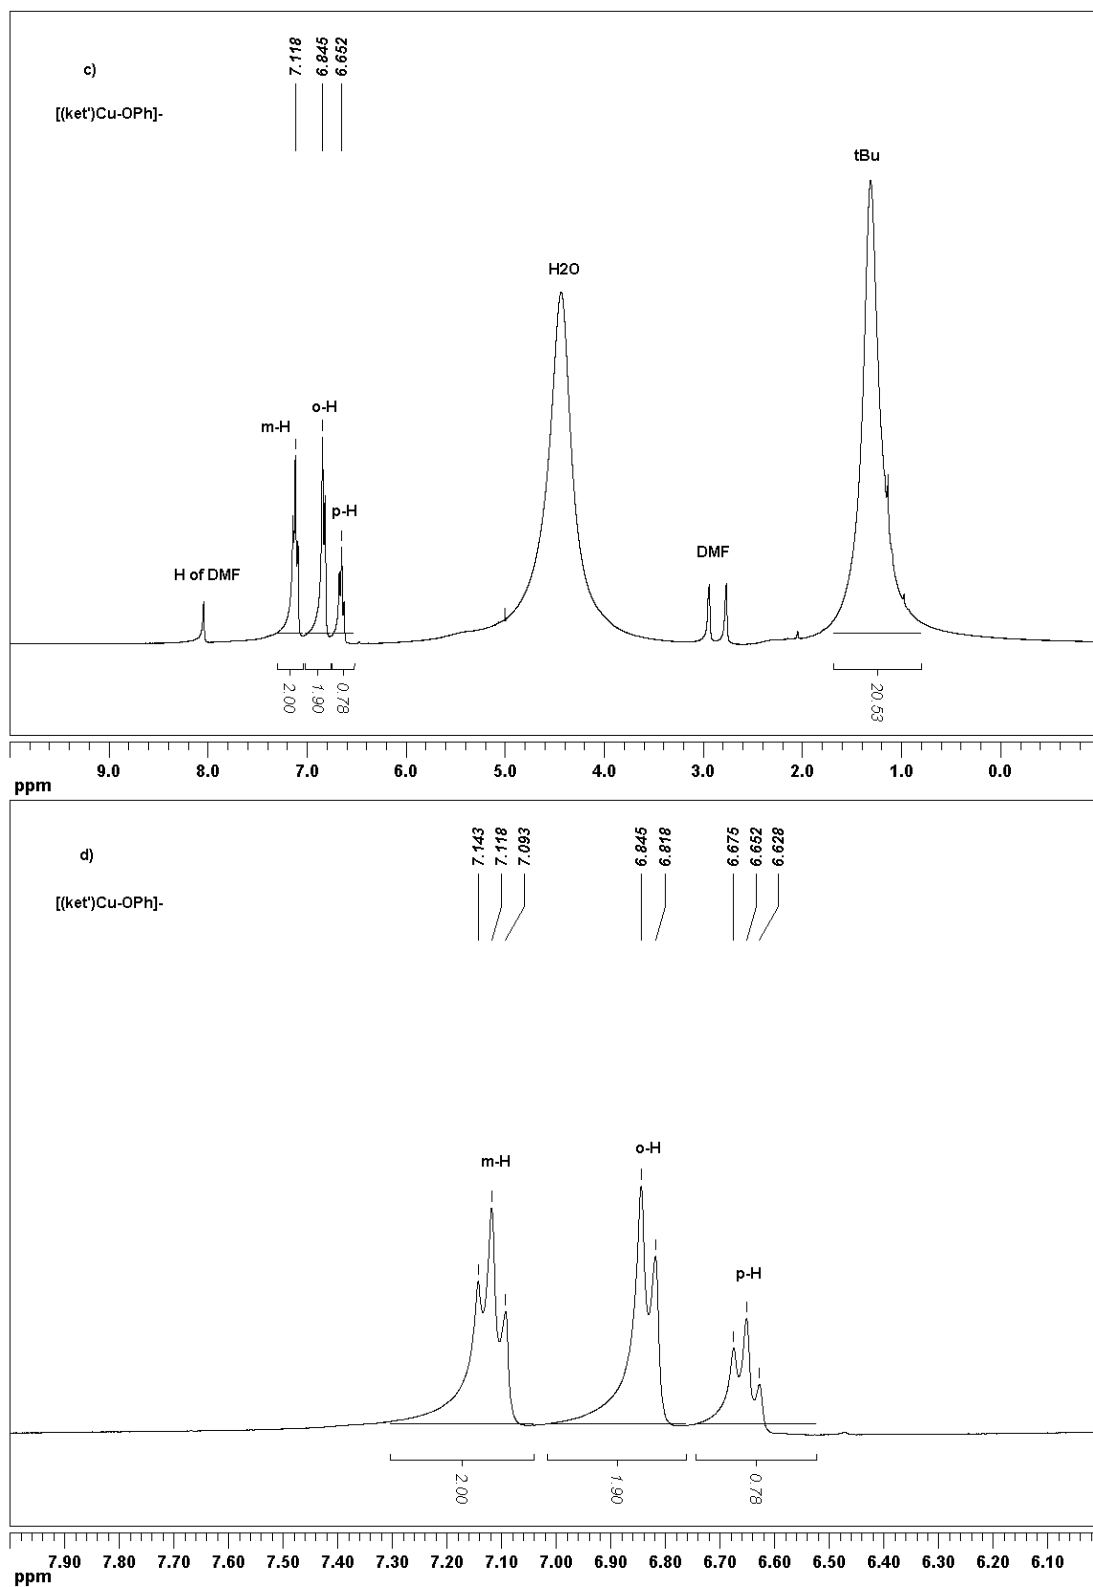

Figure S2.  $^1H$  NMR (300 MHz, TMS) in 0.5 mL of  $DMF-d_7$  of a)  $PhOH$  ( $10^{-2}$  M). b)  $PhO^-$  from  $PhOH$  ( $10^{-2}$  M) and 3 equiv of  $Cs_2CO_3$ . c)  $[(ket')Cu-OPh]^-$  from a mother solution of 2 mL of  $DMF-d_7$  containing TMHD ( $ket'H$ ) ( $3 \cdot 10^{-2}$  M),  $CsOH \cdot H_2O$  ( $3 \cdot 10^{-2}$  M) and  $CuI$  ( $3 \cdot 10^{-2}$  M) to which was added  $PhOH$  ( $3 \cdot 10^{-2}$  M) and  $Cs_2CO_3$  ( $3 \cdot 10^{-2}$  M). d) Expanded scale for the aromatic protons of  $[(ket')Cu-OPh]^-$ .

## b) by ESI-MS

To 2 mL of THF containing ket'H, CsOH and CuI (all  $3 \cdot 10^{-2}$  M), was added PhOH ( $3 \cdot 10^{-2}$  M) followed by  $\text{Cs}_2\text{CO}_3$  ( $2.2 \cdot 10^{-2}$  M). After 1 h, the ESI(-) exhibited the mass peak of  $[(\text{ket}')\text{Cu}-\text{OPh}]^-$ :  
5  $m/z = 339$  with the right isotopic pattern for a Cu center (339, 337 as major peaks, 100 % and 45 % respectively). Two other copper complexes were also detected:  $[(\text{ket}')\text{CuI}]^-, 2\text{MeCN}$  ( $m/z = 455$ ) and  $[\text{ICu}-\text{OPh}]^-, \text{THF}$  ( $m/z = 354$ ).

## 10 III. DFT calculations

All calculations were performed using the Gaussian<sup>[1a]</sup> code (G09 Revision A.02) using density functional theory (DFT) and a hybrid functional, the so-called PBE0<sup>[1b]</sup> mixing 25% of Hartree-Fock  
15 exchange to the gradient corrected PBE exchange and correlation functional<sup>[1c]</sup>. A 6-31+G(d) basis<sup>[1d,e]</sup> was used for all atoms (C, H, O, N, and I) but the metal (Cu) which was treated using a SDD basis<sup>[1f]</sup> and associated core pseudopotential.<sup>[1g]</sup> Solvent effects (here DMF) were introduced using a Continuum Polarizable Model (PCM).<sup>[1h]</sup> This model which neglects direct solute-solvent interactions, is however fully adequate to model an aprotic polar but weakly coordinating solvent for such as DMF.  
20 Computational details are reported in Supporting Information. All structures corresponding to stationary points were fully optimized in absence of geometrical constraints and characterised by subsequent frequencies calculations as minima or first order transition states (i.e. only one imaginary frequency). All molecular orbitals plots were done taking 0.02 as isovalue contour.

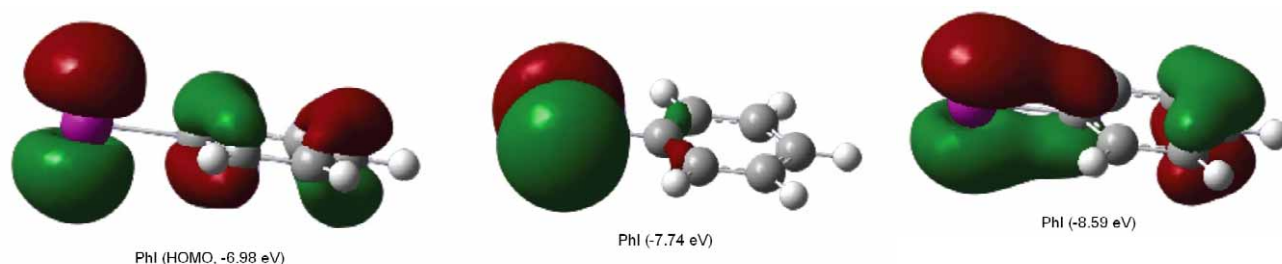

25 Figure S3: Molecular orbitals of PhI: lone pairs located on the iodine atom

Table S1. Selected computed structural parameters of the optimized structures (distance  $d$  (in Å) and angle  $\theta$  (in °)). See Scheme 3 for nomenclature and labelling for the reaction of PhI with [(ket')Cu-OH]<sup>-</sup>

|                                                            | (A)   | (B)   | (E)    | TS1   | (F)   | TSdiss | (C)   | TS2   | (D)   |
|------------------------------------------------------------|-------|-------|--------|-------|-------|--------|-------|-------|-------|
| $d$ O <sub>1</sub> -Cu                                     | 1.90  |       |        |       |       |        |       |       |       |
| $d$ O <sub>2</sub> -Cu                                     | 2.30  |       |        |       |       |        |       |       |       |
| $d$ O-Cu                                                   | 1.85  | 1.86  | 1.96   | 1.97  | 1.88  | 1.88   | 1.80  | 1.84  | 2.00  |
| $d$ Cu-C <sub>1</sub>                                      | -     | -     | 2.07   | 2.18  | 1.90  | 1.90   | 1.90  | 1.92  | 3.06  |
| $d$ O-I                                                    | -     | 2.75  | 3.92   | 4.24  | -     | -      | -     | -     | -     |
| $d$ C <sub>1</sub> -I*                                     | -     | 2.13  | 2.14   | 2.23  | 3.14  | 3.30   | -     | -     | -     |
| $d$ Cu-I                                                   | -     | 3.95  | 3.37   | 2.68  | 2.58  | 2.73   | -     | -     | -     |
| $d$ C <sub>1</sub> -O                                      | -     | -     | 3.21   | 3.12  | 2.55  | 2.55   | 2.52  | 1.98  | 1.38  |
| $d$ Cu-C <sub>ortho</sub> **                               | -     | -     | 2.12   | 2.99  | -     | -      | -     | -     | -     |
| $\theta$ (C <sub>1</sub> CuI)                              | -     | 8.5   | 37.7   | 53.5  | 87.6  | 88.8   | -     | -     | -     |
| $\theta$ (OCuO <sub>1</sub> )                              | 162.6 | 106.3 | 110.9  | 126.2 | 105.0 | 129.9  | 175.1 | 162.1 | 144.4 |
| $\theta$ (OCuO <sub>2</sub> )                              | 109.6 | 165.2 | 104.0  | 98.4  | 90.0  | 88.5   | 89.7  | 103.6 | 119.6 |
| $\theta$ (CuOI)                                            | -     | 117.0 | 59.3   | 28.3  | 13.2  | 27.3   | -     | -     | -     |
| $\theta$ (OIC <sub>1</sub> )                               | -     | 179.4 | 55.0   | 45.8  | 35.0  | 36.7   | -     | -     | -     |
| $\theta$ (IC <sub>1</sub> C <sub>para</sub> )              | -     | 179.9 | 162.2  | 160.2 | 130.0 | 126.4  | -     | -     | -     |
| $\theta$ (CuC <sub>1</sub> C <sub>para</sub> )             | -     | -     | 90.9   | 125.1 | 174.9 | 177.6  | 177.8 | 158.0 | -     |
| $\theta$ (HOCu)                                            | 106.4 | 109.4 | 105.5  | 104.1 | 97.6  | 97.6   | 99.3  | 109.0 | 119.2 |
| $\theta$ (C <sub>1</sub> CuO)                              | -     | -     | 105.7  | 105.6 | 84.7  | 84.9   | 85.8  | -63.5 | 20.3  |
| $\theta$ (C <sub>o</sub> CuC <sub>1</sub> )**              | -     | -     | 39.6   | 25.9  | -     | -      | -     | -     | -     |
| $\theta$ (O <sub>1</sub> O <sub>2</sub> OCu)               | 0.0   | -0.15 | -50.0  | -37.8 | -51.8 | -34.6  | -0.4  | -1.8  | 10.0  |
| $\theta$ (O <sub>1</sub> O <sub>2</sub> CuC <sub>1</sub> ) | -     | .76.6 | -114.4 | -     | 156.3 | 147.5  | -     | 179.9 | -     |
|                                                            |       |       |        | 105.6 |       |        | 174.1 |       | 179.9 |
| $\theta$ (CuOIC <sub>1</sub> )                             | -     | 144.5 | -40.7  | 98.3  | 96.8  | 72.7   | -     | -     | -     |
| $\theta$ (HOIC <sub>1</sub> )                              | -     | -93.9 | -110.2 | 155.7 | 164.0 | 156.1  | -     | -     | -     |
| $\theta$ (HOCuO <sub>1</sub> )                             | -180  | 177.9 | 64.6   | 71.8  | 74.6  | 81.8   | 177.8 | -97.5 | 0.1   |

\*  $d$  C<sub>1</sub>-I (in PhI) = 2.12 Å

\*\* C<sub>ortho</sub> is the carbon atom in the *ortho*-position of PhI when the latter is  $\eta^2$ -ligated onto the copper center in (E) and (TS1),



Table S2. Selected computed structural parameters of the optimized structures (distance  $d$  (Å) and angle  $\theta$  (°)). See Scheme 6 for nomenclature and labelling for the reaction of PhI with [(ket')Cu-OPh]<sup>-</sup>Cu-O<sub>2</sub>

|                                                            | (A')   | (B')   | (E')   | TS'1   | (F')   | (C')  | TS'2   | (D')  |
|------------------------------------------------------------|--------|--------|--------|--------|--------|-------|--------|-------|
| $d$ O <sub>1</sub> -Cu                                     | 1.92   |        |        |        |        |       |        |       |
| $d$ O <sub>2</sub> -Cu                                     | 2.18   |        |        |        |        |       |        |       |
| $d$ O-Cu                                                   | 1.88   | 1.90   | 2.00   | 2.02   | 1.93   | 1.82  | 1.88   | 2.02  |
| $d$ Cu-C <sub>1</sub>                                      | -      | -      | 2.09   | 2.08   | 1.91   | 1.90  | 1.95   | -     |
| $d$ O-I                                                    | -      | 2.92   | 3.81   | 3.30   | -      | -     | -      | -     |
| $d$ C <sub>1</sub> -I*                                     | -      | 2.12   | 3.81   | 2.30   | 3.1    | -     | -      | -     |
| $d$ Cu-I                                                   | -      | 3.73   | 3.35   | 2.61   | 2.59   | -     | -      | -     |
| $d$ C <sub>1</sub> -O                                      | -      | -      | 3.24   | 3.02   | 2.62   | 2.54  | 1.91   | 1.40  |
| $d$ Cu-C <sub>ortho</sub> ***                              | -      | -      | 2.15   | 2.93   | -      | -     | -      | -     |
| $\theta$ (C <sub>1</sub> CuI)                              | -      | 11.1   | 38.2   | 57.4   | 85.6   | -     | -      | -     |
| $\theta$ (OCuO <sub>1</sub> )                              | 107.8  | 150.2  | 105.2  | 118.0  | 109.4  | 174.0 | 159.0  | 129.0 |
| $\theta$ (OCuO <sub>2</sub> )                              | 162.3  | 120.2  | 107.2  | 99.4   | 92.3   | 91.1  | 106.0  | 133.8 |
| $\theta$ (CuOI)                                            | -      | 99.4   | 61.4   | 24.7   | 181.1  | -     | -      | -     |
| $\theta$ (OIC <sub>1</sub> )                               | -      | 179.2  | 12.0   | 42.1   | 36.5   | -     | -      | -     |
| $\theta$ (IC <sub>1</sub> C <sub>para</sub> )              | -      | 179.9  | 163.2  | 155.5  | 129.0  | -     | -      | -     |
| $\theta$ (CuC <sub>1</sub> C <sub>para</sub> )             | -      | -      | 91.4   | 131.7  | 174.4  | 176.6 | 153.3  | -     |
| $\theta$ (COCu)**                                          | 126.3  | 126.6  | 125.1  | 125.9  | 118.3  | 124.3 | 61.7   | 116.3 |
| $\theta$ (C <sub>1</sub> CuO)                              | -      | -      | 104.6  | 94.7   | 85.9   | 85.9  | 60.0   | 25.3  |
| $\theta$ (C <sub>o</sub> CuC <sub>1</sub> )***             | -      | -      | 40.0   | 28.1   | -      | -     | -      | -     |
| $\theta$ (O <sub>1</sub> O <sub>2</sub> OCu)               | -1.8   | 1.91   | -52.4  | -42.5  | -48.2  | -1.5  | -2.6   | -0.0  |
| $\theta$ (O <sub>1</sub> O <sub>2</sub> CuC <sub>1</sub> ) | -      | 93.3   | -119.1 | -116.7 | -177.6 | 149.5 | -177.0 | -     |
| $\theta$ (CuOIC <sub>1</sub> )                             | -      | -4.7   | -38.6  | 105.1  | 87.4   | -     | -      | -     |
| $\theta$ (COIC <sub>1</sub> )**                            | -      | -144.1 | 74.6   | 126.1  | 80.9   | -     | -      | -     |
| $\theta$ (COCuO <sub>1</sub> )**                           | -172.1 | 161.9  | 155.5  | 40.8   | 2.99   | -93.0 | -12.7  | 179.8 |

\*  $d$  C<sub>1</sub>-I (in PhI) = 2.12

5 \*\*\* "C" is the carbon atom linked to the O of phenoxy group in (A'), (B'), (E'), (TS1'), (F'), (C'), (TS2'), (D').

\*\*\* C<sub>ortho</sub> is the carbon atom in the *ortho*-position of PhI when the latter is  $\eta^2$ -ligated onto the copper center in (E') and TS1'.

10

Table S3. Spin Multiplicity and Negative Frequencies /cm<sup>-1</sup>

|                                        | (A) | (B) | (B'') | (E) | TS1   | (F) | (TSdiss) | (C) | (TS2)  | (D) |
|----------------------------------------|-----|-----|-------|-----|-------|-----|----------|-----|--------|-----|
| Spin multiplicity                      | 1   | 1   | 1     | 1   | 1     | 1   | 1        | 1   | 1      | 1   |
| Negative frequencies /cm <sup>-1</sup> | -   | -   | -     | -   | -93.4 | -   | -68.2    | -   | -301.0 | -   |

  

|                                        | (A') | (B') | (E') | TS'1  | (F') | (C') | (TS'2) | (D') |
|----------------------------------------|------|------|------|-------|------|------|--------|------|
| Spin multiplicity                      | 1    | 1    | 1    | 1     | 1    | 1    | 1      | 1    |
| Negative frequencies /cm <sup>-1</sup> | -    | -    | -    | -62.5 | -    | -    | -305.3 | -    |

Table S4. Selected computed structural parameters of the optimized structures (distance  $d$  (Å) and angle  $\theta$  (°)) for complex **B''** (See Fig 2 for labelling).

|                                                            | <b>(B'')</b> |
|------------------------------------------------------------|--------------|
| $d$ O <sub>1</sub> -Cu                                     | 1.86         |
| $d$ O <sub>2</sub> -Cu                                     | 2.26         |
| $d$ O-Cu                                                   | 1.85         |
| $d$ C <sub>1</sub> -I *                                    | 2.14         |
| $d$ Cu-C <sub>1</sub>                                      | 5.31         |
| $d$ Cu-I                                                   | 3.18         |
| $\theta$ (C <sub>1</sub> CuI)                              | 1.96         |
| $\theta$ (OCuO <sub>1</sub> )                              | 168.0        |
| $\theta$ (OCuO <sub>2</sub> )                              | 102.6        |
| $\theta$ (CuOI)                                            | 65.5         |
| $\theta$ (OIC <sub>1</sub> )                               | 152.8        |
| $\theta$ (IC <sub>1</sub> C <sub>para</sub> )              | 179.9        |
| $\theta$ (HOCu)                                            | 103.8        |
| $\theta$ (O <sub>1</sub> O <sub>2</sub> OCu)               | 0.2          |
| $\theta$ (O <sub>1</sub> O <sub>2</sub> CuC <sub>1</sub> ) | 22           |
| $\theta$ (CuO <sub>1</sub> C <sub>1</sub> )                | -179.3       |
| $\theta$ (HOIC <sub>1</sub> )                              | 165.5        |
| $\theta$ (HOCuO <sub>1</sub> )                             | -178.8       |

\*  $d$  C<sub>1</sub>-I (in PhI) = 2.12 Å

Cartesian coordinates of computed structures (in Ångströms). The most stable spin multiplicities are given between parenthesis.

### Complex [(ket')CuI]<sup>-</sup> (1)

|    |    |            |            |            |
|----|----|------------|------------|------------|
| 5  | Cu | -1.0829330 | -0.0005390 | -0.0001940 |
|    | O  | 0.3031590  | -1.4603990 | -0.0001310 |
|    | C  | 1.5563010  | -1.2633170 | -0.0001570 |
|    | C  | 2.1827570  | 0.0002360  | -0.0002870 |
|    | C  | 1.5558220  | 1.2635250  | -0.0002890 |
| 10 | O  | 0.3025910  | 1.4601060  | -0.0004850 |
|    | C  | 2.4568460  | 2.5191140  | 0.0000550  |
|    | H  | 3.2670350  | 0.0004440  | -0.0001830 |
|    | C  | 2.4578000  | -2.5185190 | 0.0000350  |
|    | C  | 1.6039730  | -3.7876010 | 0.0002000  |
| 15 | H  | 0.9604070  | -3.8399360 | -0.8842210 |
|    | H  | 2.2588350  | -4.6676360 | 0.0003330  |
|    | H  | 0.9603870  | -3.8396870 | 0.8846210  |
|    | C  | 3.3449590  | -2.5197800 | 1.2554580  |
|    | H  | 3.9573550  | -3.4303880 | 1.2770110  |
| 20 | H  | 4.0228340  | -1.6601490 | 1.2820130  |
|    | H  | 2.7369760  | -2.5006120 | 2.1681460  |
|    | C  | 3.3450650  | -2.5201790 | -1.2553060 |
|    | H  | 3.9574930  | -3.4307740 | -1.2764930 |
|    | H  | 2.7371570  | -2.5013510 | -2.1680520 |
| 25 | H  | 4.0229170  | -1.6605410 | -1.2821120 |
|    | C  | 1.6024890  | 3.7878410  | -0.0006730 |
|    | H  | 0.9582820  | 3.8398790  | 0.8832950  |
|    | H  | 2.2569910  | 4.6681450  | -0.0003300 |
|    | H  | 0.9595030  | 3.8396730  | -0.8855480 |
| 30 | C  | 3.3449160  | 2.5208250  | -1.2546920 |
|    | H  | 4.0232590  | 1.6615490  | -1.2808090 |
|    | H  | 2.7376240  | 2.5013870  | -2.1678370 |
|    | H  | 3.9568990  | 3.4317240  | -1.2757890 |
|    | C  | 3.3431440  | 2.5210220  | 1.2560730  |
| 35 | H  | 3.9552850  | 3.4318010  | 1.2777910  |
|    | H  | 2.7345540  | 2.5019510  | 2.1683590  |
|    | H  | 4.0212320  | 1.6615770  | 1.2833380  |
|    | I  | -3.5601960 | -0.0001520 | 0.0000850  |

### Complex A (1)

|    |    |            |            |            |
|----|----|------------|------------|------------|
| 40 | Cu | -0.3799890 | 2.3234960  | 0.0000550  |
|    | O  | 1.4436860  | 0.9136720  | -0.0003070 |
|    | C  | 1.3235430  | -0.3357560 | -0.0001820 |
|    | C  | 0.0812200  | -1.0277520 | -0.0000500 |
| 45 | C  | -1.2017620 | -0.4663590 | 0.0001110  |
|    | O  | -1.4816260 | 0.7790300  | 0.0003220  |
|    | C  | -2.4148890 | -1.4255200 | -0.0000380 |
|    | O  | 0.1951250  | 4.0822900  | -0.0000960 |
|    | H  | 1.1626820  | 4.0534770  | -0.0006200 |
| 50 | H  | 0.1294860  | -2.1111440 | -0.0001400 |
|    | C  | 2.6140080  | -1.1928720 | -0.0000050 |
|    | C  | 3.8467760  | -0.2887710 | -0.0006970 |
|    | H  | 3.8706620  | 0.3576650  | 0.8830010  |
|    | H  | 4.7546800  | -0.9047180 | -0.0004840 |
| 55 | H  | 3.8704090  | 0.3566630  | -0.8851460 |
|    | C  | 2.6495460  | -2.0795540 | -1.2547280 |
|    | H  | 3.5833120  | -2.6563470 | -1.2781320 |
|    | H  | 1.8168850  | -2.7903520 | -1.2807260 |
|    | H  | 2.6056020  | -1.4731000 | -2.1678130 |
| 60 | C  | 2.6497630  | -2.0779880 | 1.2558670  |
|    | H  | 3.5834160  | -2.6549460 | 1.2797370  |
|    | H  | 2.6061930  | -1.4703570 | 2.1681810  |
|    | H  | 1.8169180  | -2.7885290 | 1.2829430  |
|    | C  | -3.7252790 | -0.6356040 | 0.0005930  |
| 65 | H  | -3.8107400 | 0.044550   | -0.8836850 |
|    | H  | -4.5710050 | -1.3344940 | 0.0004140  |
|    | H  | -3.8103810 | 0.035760   | 0.8855420  |
|    | C  | -2.3765860 | -2.3132070 | 1.2544460  |
|    | H  | -1.4854040 | -2.9488650 | 1.2820670  |
| 70 | H  | -2.3877240 | -1.7055850 | 2.1675150  |
|    | H  | -3.2571160 | -2.9683100 | 1.2740900  |
|    | C  | -2.3769980 | -2.3119900 | -1.2554010 |
|    | H  | -3.2575240 | -2.9670880 | -1.2754180 |
|    | H  | -2.3884010 | -1.7034870 | -2.1678800 |
| 75 | H  | -1.4857990 | -2.9475940 | -1.2838840 |

## Complex B (1)

|      |            |            |            |
|------|------------|------------|------------|
| Cu   | 1.1376440  | -1.3879030 | -0.8677500 |
| O    | 1.3832470  | 0.8624400  | -0.8408750 |
| C    | 2.3941810  | 1.4293610  | -0.3575890 |
| 5 C  | 3.4858350  | 0.7510450  | 0.2492780  |
| C    | 3.6331900  | -0.6322010 | 0.4132540  |
| O    | 2.8061520  | -1.5282560 | 0.0357950  |
| C    | 4.9107170  | -1.1503080 | 1.1132630  |
| O    | -0.4770290 | -1.7272400 | -1.7219650 |
| 10 H | -0.6093630 | -2.6828940 | -1.7895980 |
| H    | 4.2929080  | 1.3682250  | 0.6284880  |
| C    | 2.4632080  | 2.9750450  | -0.4241130 |
| C    | 1.2110630  | 3.5294080  | -1.1040270 |
| H    | 0.3027900  | 3.2532250  | -0.5581660 |
| 15 H | 1.2687950  | 4.6244040  | -1.1436800 |
| H    | 1.1109660  | 3.1540880  | -2.1278290 |
| C    | 3.6972550  | 3.4045290  | -1.2330910 |
| H    | 3.7260380  | 4.4986500  | -1.3174790 |
| H    | 4.6320950  | 3.0804810  | -0.7635610 |
| 20 H | 3.6666500  | 2.9896610  | -2.2482100 |
| C    | 2.5522990  | 3.5540700  | 0.9965810  |
| H    | 2.5627090  | 4.6508380  | 0.9518550  |
| H    | 1.6889330  | 3.2500430  | 1.6012280  |
| H    | 3.4600770  | 3.2316700  | 1.5173150  |
| 25 C | 4.8891570  | -2.6770150 | 2.105150   |
| H    | 4.8434930  | -3.1437680 | 0.2211560  |
| H    | 5.8025080  | -3.0225050 | 1.7106490  |
| H    | 4.0285640  | -3.0317390 | 1.7871690  |
| C    | 4.9985980  | -0.5695310 | 2.5336120  |
| 30 H | 5.0747260  | 0.5227610  | 2.5273890  |
| H    | 4.1179150  | -0.8444550 | 3.1267970  |
| H    | 5.8863170  | -0.9654860 | 3.0435030  |
| C    | 6.1504070  | -0.7265780 | 3.3090200  |
| H    | 7.0568260  | -1.1236180 | 3.7839990  |
| 35 H | 6.1078440  | -1.1168200 | 3.7151960  |
| H    | 6.2508830  | 0.3623720  | 3.02522180 |
| I    | -2.7462640 | -0.7581280 | -0.5104200 |
| C    | -4.5171920 | -0.0012040 | 0.4103160  |
| C    | -5.6329260 | 0.3141790  | -0.3692060 |
| 40 C | -4.5596490 | 0.1797980  | 1.7950850  |
| C    | -6.7875510 | 0.8100860  | 0.2389250  |
| H    | -5.6068740 | 0.1759670  | -1.4468250 |
| C    | -5.7177480 | 0.6763500  | 2.3958590  |
| H    | -3.6953150 | -0.0636610 | 2.4072460  |
| 45 C | -6.8338510 | 0.9927710  | 1.6211250  |
| H    | -7.6523050 | 0.0537640  | -0.3736890 |
| H    | -5.7436580 | 0.8151220  | 3.4740650  |
| H    | -7.7341410 | 0.3792660  | 2.0916600  |

## Complex E (1)

|      |             |             |            |
|------|-------------|-------------|------------|
| Cu   | 0.4274110   | -0.66033100 | 7.2227150  |
| O    | -1.5476710  | -1.28458700 | 6.767640   |
| C    | -2.5782420  | -0.68068900 | 2.502910   |
| 5 C  | -2.64613900 | 6.838000    | -0.0828980 |
| C    | -3.8339510  | -1.57375000 | 1.086170   |
| C    | -1.59497301 | 6.328050    | 0.0295390  |
| O    | -0.42943701 | 3.795240    | 0.4259960  |
| C    | -1.91617103 | 0.966120    | -0.3651140 |
| 10 C | 2.1597400   | -0.8648680  | -0.3929380 |
| C    | 2.7408130   | -2.1378650  | -0.1507230 |
| C    | 1.0710430   | -0.7446680  | -1.2981290 |
| C    | 2.2163890   | -3.2596660  | -0.7636730 |
| H    | 3.5925200   | -2.22386100 | 5.167970   |
| 15 C | 0.5742510   | -1.9156110  | -1.9204250 |
| H    | 0.7399770   | 0.2313850   | -1.6398790 |
| C    | 1.1297250   | -3.1527060  | -1.6551870 |
| H    | 2.6578630   | -4.2318890  | -0.5594620 |
| H    | -0.2476000  | -1.8203850  | -2.6256930 |
| 20 H | 0.7406330   | -4.0419870  | -2.1437620 |
| I    | 3.3600930   | 0.8569400   | 0.0511100  |
| H    | -3.59695401 | 0.0579190   | -0.4386250 |
| C    | -0.67683903 | 9.752560    | -0.1932070 |
| H    | 0.1503870   | 3.6284570   | -0.8216140 |
| 25 H | -0.91588005 | 0.075290    | -0.4786080 |
| H    | -0.32703003 | 9.783640    | 0.8444570  |
| C    | -2.35970103 | 1.531470    | -1.8355110 |
| H    | -3.27945902 | 5.854880    | -2.0111770 |
| H    | -2.54635604 | 1.943970    | -2.1291810 |
| 30 H | -1.58235202 | 7.512760    | -2.4972850 |
| C    | -3.03795703 | 6.439640    | 0.5312760  |
| H    | -2.75614303 | 5.928940    | 1.5902270  |
| H    | -3.23310204 | 6.959110    | 0.2850670  |
| H    | -3.97426303 | 0.905990    | 0.4038600  |
| 35 C | -5.0892710  | -0.8388110  | -0.3657890 |
| H    | -5.3855080  | -0.04187100 | 3.267170   |
| H    | -4.9580010  | -0.3990180  | -1.3616330 |
| H    | -5.9238540  | -1.5486220  | -0.4278650 |
| C    | -3.5060240  | -2.6863270  | -0.8988080 |
| 40 H | -2.6237950  | -3.2515410  | -0.5827570 |
| H    | -4.3521170  | -3.3801990  | -0.9833930 |
| H    | -3.3089360  | -2.2713530  | -1.8956450 |
| C    | -4.1215290  | -2.20321201 | 4.796840   |
| H    | -4.9697530  | -2.89586301 | 4.071230   |
| 45 H | -3.2508190  | -2.75657801 | 8.440990   |
| H    | -4.3755300  | -1.43501202 | 2.2212980  |
| O    | 0.9660550   | -0.92749002 | 5.878750   |
| H    | 0.1476600   | -0.88827403 | 1.022540   |

## TS1 (1)

Negative frequency:  $-93,4 \text{ cm}^{-1}$

|      |            |             |            |
|------|------------|-------------|------------|
| Cu   | -0.6144280 | -0.4722890  | -0.8459860 |
| O    | 0.3409800  | 1.3773010   | -0.4267290 |
| 5 C  | 1.5500570  | 1.5712920   | -0.1012480 |
| C    | 2.5586180  | 0.5886990   | -0.0818450 |
| C    | 1.8849780  | 3.0269730   | 0.3044090  |
| C    | 2.4160540  | -0.7687690  | -0.4620660 |
| O    | 1.3522200  | -1.2981830  | -0.8816990 |
| 10 C | 3.6691870  | -1.6735080  | -0.3664960 |
| C    | -2.5846260 | -0.10691500 | 0.0203290  |
| C    | -2.6883420 | 1.2904290   | 0.0753100  |
| C    | -3.5685110 | -0.8729520  | -0.6217220 |
| C    | -3.7345550 | 1.9190980   | -0.5984830 |
| 15 H | -1.9400570 | 1.8726420   | 0.6013510  |
| C    | -4.6077590 | -0.2252270  | -1.2824450 |
| H    | -3.5070970 | -1.9561640  | -0.6245460 |
| C    | -4.6962500 | 1.1693360   | -1.2769490 |
| H    | -3.7991710 | 3.0045290   | -0.5801760 |
| 20 H | -5.3579980 | -0.8185110  | -1.7998890 |
| H    | -5.5165680 | 1.6664560   | -1.7877610 |
| I    | -1.4125420 | -1.1215110  | 1.6251420  |
| H    | 3.5442080  | 0.8977940   | 0.2403550  |
| C    | 3.3298200  | -3.0985670  | -0.8052990 |
| 25 H | 2.9829680  | -3.1275340  | -1.8435470 |
| H    | 4.2233210  | -3.7301830  | -0.7240120 |
| H    | 2.5435460  | -3.5340340  | -0.1796330 |
| C    | 4.7766280  | -1.1257840  | -1.2808580 |
| H    | 5.1078660  | -0.1280040  | -0.9746000 |
| 30 H | 5.6481110  | -1.7926910  | -1.2512610 |
| H    | 4.4348040  | -1.0647600  | -2.3214530 |
| C    | 4.1741600  | -1.7117380  | 1.0843140  |
| H    | 4.4804660  | -0.7226380  | 1.4403670  |
| H    | 3.3991590  | -2.0905700  | 1.7619620  |
| 35 H | 5.0422330  | -2.3796370  | 1.1593220  |
| C    | 1.5178040  | 3.9386390   | -0.8759160 |
| H    | 0.4668840  | 3.8122200   | -1.1532350 |
| H    | 1.6834050  | 4.9896920   | -0.6072040 |
| H    | 2.1349810  | 3.7140970   | -1.7552980 |
| 40 C | 1.0104000  | 3.3891000   | 1.5139500  |
| H    | -0.0502110 | 3.2514330   | 1.2818060  |
| H    | 1.2566450  | 2.7640690   | 2.3818770  |
| H    | 1.1699400  | 4.4374680   | 1.7965660  |
| C    | 3.3511110  | 3.2657930   | 0.6703660  |
| 45 H | 3.6621010  | 2.6694730   | 1.5363770  |
| H    | 4.0244640  | 3.0390100   | -0.1647440 |
| H    | 3.4935830  | 4.3221490   | 0.9311620  |
| O    | -1.2181920 | -1.0937170  | -2.6130160 |
| H    | -0.3971560 | -1.2984440  | -3.0832780 |

## Complex F (1)

|      |            |            |            |
|------|------------|------------|------------|
| Cu   | -0.7208570 | -0.4869660 | -0.6856780 |
| O    | 0.2608940  | 1.4853390  | -0.3640640 |
| C    | 1.4794860  | 1.6220160  | -0.0820450 |
| 5 C  | 2.4376320  | 0.5789930  | -0.1316330 |
| C    | 1.9150110  | 3.0491960  | 0.3216020  |
| C    | 2.2026940  | -0.7400970 | -0.5415560 |
| O    | 1.0734570  | -1.2393670 | -0.8591260 |
| C    | 3.4025830  | -1.7084600 | -0.6224110 |
| 10 I | -0.9882310 | -1.1362950 | 1.7966650  |
| C    | -2.5499490 | 0.0283720  | -0.6646730 |
| C    | -3.5452840 | -0.9007120 | -0.9416770 |
| C    | -2.8369070 | 1.3752630  | -0.4850310 |
| C    | -4.8700390 | -0.4647260 | -1.0357760 |
| 15 H | -3.3080190 | -1.9513900 | -1.0828720 |
| C    | -4.1677110 | 1.7993350  | -0.5846550 |
| H    | -2.0425890 | 2.0860470  | -0.2750940 |
| C    | -5.1836150 | 0.8839900  | -0.8576200 |
| H    | -5.6557050 | -1.1863410 | -1.2494980 |
| 20 H | -4.4022660 | 2.8529770  | -0.4476260 |
| H    | -6.2153050 | 1.2188540  | -0.9321970 |
| H    | 3.4588080  | 0.8267540  | 0.1240040  |
| C    | 2.9691250  | -3.0598690 | -1.1936660 |
| H    | 2.5650370  | -2.9578510 | -2.2066010 |
| 25 H | 3.8371170  | -3.7289290 | -1.2378920 |
| H    | 2.2023960  | -3.5339080 | -0.5730970 |
| C    | 4.5021390  | -1.1245720 | -1.5224360 |
| H    | 4.1229070  | -0.9292680 | -2.5327630 |
| H    | 4.9104410  | -0.1890180 | -1.1269930 |
| 30 H | 5.3290650  | -1.8411110 | -1.6051400 |
| C    | 3.9557810  | -1.9236410 | 0.7964170  |
| H    | 4.3346590  | -0.9930490 | 1.2320030  |
| H    | 3.1820700  | -2.3214660 | 1.4642200  |
| H    | 4.7817960  | -2.6455990 | 0.7670820  |
| 35 C | 3.3957690  | 3.1846320  | 0.6816000  |
| H    | 3.6720100  | 2.5500480  | 1.5320820  |
| H    | 4.0498690  | 2.9361830  | -0.1625360 |
| H    | 3.6057470  | 4.2235730  | 0.9646200  |
| C    | 1.0707160  | 3.4692230  | 1.5341410  |
| 40 H | 1.3023050  | 4.5050790  | 1.8120380  |
| H    | 0.0022090  | 3.4007160  | 1.3084450  |
| H    | 1.2800620  | 2.8318570  | 2.4025320  |
| C    | 1.6035850  | 3.9793980  | -0.8605280 |
| H    | 1.8415960  | 5.0172380  | -0.5955520 |
| 45 H | 2.1983500  | 3.7107730  | -1.7427730 |
| H    | 0.5444860  | 3.9243430  | -1.1304300 |
| O    | -0.9558440 | -0.6153200 | -2.5427580 |
| H    | -0.0301250 | -0.7961470 | -2.7772880 |

## TSdiss (1)

Negative frequency:  $-62,8 \text{ cm}^{-1}$

|      |            |            |            |
|------|------------|------------|------------|
| Cu   | -0.6323220 | -0.4962960 | -0.7433940 |
| O    | 0.1315950  | 1.3940850  | -0.3407710 |
| 5 C  | 1.3405830  | 1.6444620  | -0.0583390 |
| C    | 2.3895610  | 0.7067250  | -0.1087650 |
| C    | 1.6159850  | 3.1063290  | 0.3477780  |
| C    | 2.2685610  | -0.6224690 | -0.5442820 |
| O    | 1.1809610  | -1.1956620 | -0.8697090 |
| 10 C | 3.5403210  | -1.4855560 | -0.6493680 |
| I    | -0.9551370 | -1.2256690 | 1.8733130  |
| C    | -2.4626490 | 0.0321720  | -0.7789960 |
| C    | -3.4527230 | -0.9140870 | -1.0120940 |
| C    | -2.7579670 | 1.3799940  | -0.6311650 |
| 15 C | -4.7837250 | -0.4957840 | -1.0816060 |
| H    | -3.1981840 | -1.9602750 | -1.1464560 |
| C    | -4.0967850 | 1.7868200  | -0.7129490 |
| H    | -1.9691660 | 2.1043570  | -0.4532330 |
| C    | -5.1083390 | 0.8545510  | -0.9336770 |
| 20 H | -5.5658520 | -1.2314840 | -1.2569290 |
| H    | -4.3379020 | 2.8419890  | -0.6013210 |
| H    | -6.1450990 | 1.1766660  | -0.9932990 |
| H    | 3.3818870  | 1.0469700  | 0.1516520  |
| C    | 3.2107960  | -2.8654560 | -1.2215780 |
| 25 H | 2.7823300  | -2.7925860 | -2.2269050 |
| H    | 4.1303560  | -3.4595410 | -1.2850590 |
| H    | 2.4977270  | -3.4047310 | -0.5901960 |
| C    | 4.5679780  | -0.8021480 | -1.5649930 |
| H    | 4.1569850  | -0.6418410 | -2.5689240 |
| 30 H | 4.8944080  | 0.1664520  | -1.1731910 |
| H    | 5.4548020  | -1.4407400 | -1.6611450 |
| C    | 4.1336250  | -1.6584980 | 0.7591100  |
| H    | 4.4375200  | -0.7017490 | 1.1965590  |
| H    | 3.4100670  | -2.1282920 | 1.4360810  |
| 35 H | 5.0193960  | -2.3038850 | 0.7084060  |
| C    | 3.0797120  | 3.3982040  | 0.6825940  |
| H    | 3.4359840  | 2.7977390  | 1.5278450  |
| H    | 3.7413340  | 3.2203100  | -0.1732510 |
| H    | 3.1815300  | 4.4535610  | 0.9633070  |
| 40 C | 0.7514270  | 3.4198960  | 1.5787530  |
| H    | 0.8818760  | 4.4701680  | 1.8671030  |
| H    | -0.3081340 | 3.2474210  | 1.3671070  |
| H    | 1.0378700  | 2.7960580  | 2.4344270  |
| C    | 1.1820640  | 4.0051870  | -0.8203170 |
| 45 H | 1.3183860  | 5.0594410  | -0.5498580 |
| H    | 1.7814450  | 3.8059060  | -1.7174230 |
| H    | 0.1283500  | 3.8438560  | -1.0674620 |
| O    | -1.0113730 | -1.3163670 | -2.3916550 |
| H    | -0.1083220 | -1.6112440 | -2.5985530 |



### Complex C (1)

|      |            |            |            |
|------|------------|------------|------------|
| Cu   | 0.6679820  | -1.0079820 | -0.0505900 |
| O    | 0.3954920  | 0.8281240  | -0.0025330 |
| C    | -0.7527940 | 1.4078110  | 0.0719260  |
| 5 C  | -1.9880000 | 0.7661310  | 0.0776450  |
| C    | -0.6395810 | 2.9357270  | 0.1445540  |
| C    | -2.1644100 | -0.6284090 | -0.0150870 |
| O    | -1.2049100 | -1.4583710 | -0.0738360 |
| C    | -3.5814750 | -1.2102930 | -0.0478080 |
| 10 C | 2.5447830  | -0.7080700 | -0.0466820 |
| C    | 3.3460330  | -1.3459340 | 0.8886640  |
| C    | 3.0544340  | 0.1820540  | -0.9822600 |
| C    | 4.7146000  | -1.0552820 | 0.9016220  |
| H    | 2.9268060  | -2.0638260 | 1.5867060  |
| 15 C | 4.4295020  | 0.4427210  | -0.9724300 |
| H    | 2.4104540  | 0.6793200  | -1.7017110 |
| C    | 5.2554760  | -0.1682700 | -0.0294230 |
| H    | 5.3551300  | -1.5358340 | 1.6375530  |
| H    | 4.8461580  | 1.1318720  | -1.7033930 |
| 20 H | 6.3214270  | 0.0445570  | -0.0220040 |
| H    | -2.8759220 | 1.3785710  | 0.1372680  |
| C    | -3.5359320 | -2.7351500 | -0.1589490 |
| H    | -3.0144290 | -3.1865290 | 0.6912910  |
| H    | -4.5601450 | -3.1247160 | -0.1779630 |
| 25 H | -3.0313640 | -3.0580230 | -1.0754200 |
| C    | -4.3119190 | -0.8197730 | 1.2484680  |
| H    | -3.7834640 | -1.1986350 | 2.1309030  |
| H    | -4.4187610 | 0.2647300  | 1.3525320  |
| H    | -5.3172950 | -1.2572600 | 1.2419200  |
| 30 C | -4.3349020 | -0.6379700 | -1.2604360 |
| H    | -4.4455160 | 0.4496550  | -1.2034670 |
| H    | -3.8206740 | -0.8817270 | -2.1972860 |
| H    | -5.3393160 | -1.0759740 | -1.3015820 |
| C    | 0.2155990  | 3.2887320  | 1.3727130  |
| 35 H | 1.2066960  | 2.8306890  | 1.3080190  |
| H    | 0.3383730  | 4.3764490  | 1.4322510  |
| H    | -0.2636370 | 2.9509170  | 2.2995500  |
| C    | 0.0711440  | 3.4172650  | -1.1311070 |
| H    | 1.0611350  | 2.9620170  | -1.2274470 |
| 40 H | -0.5134060 | 3.1728590  | -2.0262630 |
| H    | 0.1930850  | 4.5061330  | -1.0934120 |
| C    | -1.9922590 | 3.6402710  | 0.2579960  |
| H    | -2.6308800 | 3.4491420  | -0.6119550 |
| H    | -2.5356790 | 3.3455260  | 1.1631020  |
| 45 H | -1.8252370 | 4.7221690  | 0.3112950  |
| O    | 1.0815180  | -2.7629500 | -0.0777460 |
| H    | 0.1863910  | -3.1343800 | -0.1668980 |

## TS2 (1)

Negative frequency: -300,1 cm<sup>-1</sup>

|      |            |            |            |
|------|------------|------------|------------|
| Cu   | 0.6985560  | -1.0123010 | -0.0045640 |
| O    | 0.3611000  | 0.8452280  | -0.0137600 |
| 5 C  | -0.7972180 | 1.4013910  | -0.0042460 |
| C    | -2.0189220 | 0.7276530  | 0.0018960  |
| C    | -0.7324000 | 2.9361010  | -0.0010660 |
| C    | -2.1832200 | -0.6777130 | 0.0000700  |
| O    | -1.2252290 | -1.5050420 | -0.0030640 |
| 10 C | -3.6081070 | -1.2535100 | 0.0036760  |
| C    | 2.6135190  | -0.9643160 | -0.0028590 |
| C    | 3.2299280  | -0.7271400 | 1.2221940  |
| C    | 3.2374150  | -0.7075670 | -1.2197600 |
| C    | 4.5021630  | -0.1545620 | 1.2183190  |
| 15 H | 2.7370430  | -0.9773900 | 2.1572760  |
| C    | 4.5159770  | -0.1420800 | -1.1965070 |
| H    | 2.7477670  | -0.9174880 | -2.1669900 |
| C    | 5.1488380  | 0.1361110  | 0.0145650  |
| H    | 4.9914800  | 0.0537170  | 2.1667480  |
| 20 H | 5.0116430  | 0.0799490  | -2.1385130 |
| H    | 6.1446070  | 0.5705600  | 0.0220450  |
| H    | -2.9184390 | 1.3272480  | 0.0082250  |
| C    | -3.5671940 | -2.7824190 | -0.0037670 |
| H    | -3.0481610 | -3.1755520 | 0.8764280  |
| 25 H | -4.5920930 | -3.1719460 | 0.001390   |
| H    | -3.0583440 | -3.1670960 | -0.8936710 |
| C    | -4.3459640 | -0.7787630 | 1.2666840  |
| H    | -3.8203460 | -1.0967770 | 2.1749250  |
| H    | -4.4529120 | 0.3103620  | 1.2985340  |
| 30 H | -5.3518890 | -1.2156100 | 1.2881940  |
| C    | -4.3589470 | -0.7669750 | -1.2470550 |
| H    | -4.4679630 | 0.3222170  | -1.2669610 |
| H    | -3.8418970 | -1.0749340 | -2.1636550 |
| H    | -5.3644340 | -1.2050830 | -1.2631610 |
| 35 C | 0.0521010  | 3.3713540  | 1.2473490  |
| H    | 1.0524980  | 2.9286240  | 1.2566900  |
| H    | 0.1549870  | 4.4630320  | 1.2580510  |
| H    | -0.4679290 | 3.0716420  | 2.1655630  |
| C    | 0.0286110  | 3.3780210  | -1.2615770 |
| 40 H | 1.0287050  | 2.9355510  | -1.2920760 |
| H    | -0.5087120 | 3.0833320  | -2.1714290 |
| H    | 0.1314220  | 4.4697540  | -1.2683410 |
| C    | -2.1040630 | 3.6126180  | 0.0134640  |
| H    | -2.6983140 | 3.3587640  | -0.8720820 |
| 45 H | -2.6825460 | 3.3523530  | 0.9075610  |
| H    | -1.9663520 | 4.7003440  | 0.0160440  |
| O    | 1.5608460  | -2.6359040 | 0.0845380  |
| H    | 1.7332200  | -2.9523330 | -0.8171830 |

### Complex D (1)

|      |             |             |            |
|------|-------------|-------------|------------|
| Cu   | -0.4653900  | -1.07266700 | 0.0052450  |
| O    | 1.3839690   | -1.63899800 | 0.0037680  |
| C    | 2.3698660   | -0.8259500  | -0.0011320 |
| 5 C  | 2.2793910   | 0.5745040   | -0.0030470 |
| C    | 3.7468890   | -1.5186650  | -0.0035620 |
| C    | 1.1062980   | 1.3698090   | 0.0005880  |
| O    | -0.07878800 | 0.9258050   | 0.0042220  |
| C    | 1.2787750   | 2.9038020   | 0.0002580  |
| 10 H | 3.2146770   | 1.1172630   | -0.0068430 |
| C    | -0.08692803 | 0.5925810   | 0.0043050  |
| H    | -0.67111403 | 0.3238130   | 0.8907000  |
| H    | 0.0540040   | 4.6803150   | 0.0040990  |
| H    | -0.67615703 | 0.3241450   | -0.8788480 |
| 15 C | 2.0560930   | 3.3367570   | 1.2540650  |
| H    | 3.0676460   | 2.9181380   | 1.2777900  |
| H    | 2.1450370   | 4.4302440   | 1.2747340  |
| H    | 1.5373620   | 3.0233080   | 2.1681220  |
| C    | 2.0488630   | 3.3373830   | -1.2577560 |
| 20 H | 3.0602490   | 2.9187550   | -1.2876260 |
| H    | 1.5247940   | 3.0245330   | -2.1689670 |
| H    | 2.1377850   | 4.4308760   | -1.2782930 |
| C    | 3.8332590   | -2.39459501 | 0.2564870  |
| H    | 3.0112450   | -3.11599501 | 0.2875850  |
| 25 H | 4.7809980   | -2.94701401 | 0.2642120  |
| H    | 3.7910300   | -1.78331502 | 0.1667050  |
| C    | 3.8193080   | -2.4153070  | -1.2497750 |
| H    | 2.9972420   | -3.1372060  | -1.2596480 |
| H    | 3.7665040   | -1.8190490  | -2.1693790 |
| 30 H | 4.7671390   | -2.9675350  | -1.2591730 |
| C    | 4.9380020   | -0.5585870  | -0.0181330 |
| H    | 4.9443650   | 0.0765380   | -0.9117980 |
| H    | 4.9572450   | 0.0878150   | 0.8671940  |
| H    | 5.8683800   | -1.1394790  | -0.0210160 |
| 35 O | -2.3597990  | -1.71050700 | 0.0051370  |
| C    | -3.5334830  | -0.97988100 | 0.0012040  |
| C    | -4.7697210  | -1.6190760  | -0.0029320 |
| C    | -3.43063500 | 0.4075120   | 0.0014850  |
| C    | -5.9293170  | -0.8442180  | -0.0067680 |
| 40 H | -4.8313770  | -2.7052030  | -0.0034610 |
| C    | -4.59980601 | 0.1663140   | -0.0023680 |
| H    | -2.44921900 | 0.8769620   | 0.0045350  |
| C    | -5.85110100 | 0.5481330   | -0.0064740 |
| H    | -6.8969400  | -1.3388230  | -0.0100770 |
| 45 H | -4.52721702 | 0.2507890   | -0.0021800 |
| H    | -6.75754601 | 0.1468140   | -0.0094960 |
| H    | -2.5374170  | -2.66285600 | 0.0053410  |

### Cs<sub>2</sub>CO<sub>3</sub> (1)

|       |             |             |            |
|-------|-------------|-------------|------------|
| 50 C  | -0.28176500 | 0.1259760   | 0.2497790  |
| O     | -0.97782601 | 0.2168900   | 0.1778320  |
| O     | 1.0135240   | 0.1757410   | 0.2555870  |
| O     | -0.8890880  | -1.01793400 | 0.3114120  |
| Cs    | 3.8707070   | -0.0308680  | -0.0617220 |
| 55 Cs | -3.7158390  | -0.0373760  | -0.0738650 |

### CsHCO<sub>3</sub> (1)

|      |            |             |            |
|------|------------|-------------|------------|
| C    | 2.1719810  | 0.0459010   | -0.0000190 |
| O    | 1.6010480  | 1.1591390   | -0.0000460 |
| 60 O | 3.5402900  | 0.0581170   | 0.0000600  |
| O    | 1.6347010  | -1.0969990  | -0.0000530 |
| H    | 3.8550730  | -0.84393300 | 0.0000750  |
| Cs   | -1.2926410 | -0.00715500 | 0.0000060  |

## Complex A' (1)

|      |             |             |            |
|------|-------------|-------------|------------|
| Cu   | 0.8127510   | -0.0872930  | -0.0881080 |
| O    | -0.8285820  | -1.5272320  | -0.0380540 |
| C    | -2.0438970  | -1.19053300 | 0.068430   |
| 5 C  | -2.51025100 | 1.456570    | 0.0093580  |
| C    | -3.0555580  | -2.35910800 | 0.0655140  |
| C    | -1.72281901 | 3.105060    | -0.0229190 |
| O    | -0.45118701 | 3.3530970   | -0.0593640 |
| C    | -2.44512102 | 6.761800    | -0.0134280 |
| 10 H | -3.58127200 | 2.948210    | 0.0423520  |
| C    | -1.42948903 | 8.203310    | -0.0376950 |
| H    | -0.80087303 | 7.820610    | -0.9333370 |
| H    | -1.96194904 | 7.795180    | -0.0331640 |
| H    | -0.76953803 | 7.915620    | 0.8356080  |
| 15 C | -3.34712602 | 7.915730    | -1.2528970 |
| H    | -4.12927502 | 0.254720    | -1.2641660 |
| H    | -3.83671503 | 7.737920    | -1.2662060 |
| H    | -2.76283302 | 6.934740    | -2.1759640 |
| C    | -3.30038002 | 8.048950    | 1.2573400  |
| 20 H | -4.08739802 | 0.450500    | 1.3033250  |
| H    | -2.68352002 | 7.089930    | 2.1591780  |
| H    | -3.78261403 | 7.905280    | 1.2816970  |
| C    | -2.8411830  | -3.2247830  | -1.1850750 |
| H    | -1.8035290  | -3.5664680  | -1.2483880 |
| 25 H | -3.4957460  | -4.1050020  | -1.1526080 |
| H    | -3.0749660  | -2.6640190  | -2.0990660 |
| C    | -2.7323950  | -3.18819701 | 3.176430   |
| H    | -1.6927140  | -3.52936101 | 3.006260   |
| H    | -2.8863000  | -2.60001502 | 2.313640   |
| 30 H | -3.3871160  | -4.06740401 | 3.679970   |
| C    | -4.5234060  | -1.93133300 | 1.235550   |
| H    | -4.7416690  | -1.33027901 | 0.143080   |
| H    | -4.8207830  | -1.3571620  | -0.7620730 |
| H    | -5.1603270  | -2.82383900 | 1.655100   |
| 35 O | 2.4255890   | -1.0557490  | -0.1489990 |
| C    | 3.6371530   | -0.5547780  | -0.0538530 |
| C    | 4.7642970   | -1.4117680  | -0.1397760 |
| C    | 3.9010990   | 0.8240780   | 0.1376050  |
| C    | 6.0615780   | -0.9176440  | -0.0404460 |
| 40 H | 4.5894300   | -2.4760810  | -0.2864820 |
| C    | 5.2035740   | 1.3084680   | 0.2359910  |
| H    | 3.0509980   | 1.5026180   | 0.2073600  |
| C    | 6.3012790   | 0.4475860   | 0.1489490  |
| H    | 6.8995730   | -1.6095760  | -0.1116210 |
| 45 H | 5.3625240   | 2.3757150   | 0.3834970  |
| H    | 7.3161280   | 0.8293900   | 0.2264530  |

### Complex B'(1)

|      |             |             |            |
|------|-------------|-------------|------------|
| Cu   | 0.9319280   | 0.2905440   | -0.4858600 |
| O    | 1.3894740   | -1.5809620  | -0.3918790 |
| C    | 2.5156480   | -2.1338310  | -0.1512370 |
| 5 C  | 3.7141430   | -1.46263500 | 1.185800   |
| C    | 2.4681230   | -3.6755740  | -0.1718620 |
| C    | 3.8985880   | -0.05416800 | 1.807410   |
| O    | 2.9920320   | 0.7973150   | -0.0054480 |
| C    | 5.3192690   | 0.4669400   | 0.5022720  |
| 10 H | 4.5885660   | -2.07209400 | 3.033940   |
| C    | 5.3272020   | 1.9955170   | 0.5355210  |
| H    | 4.6448340   | 2.3843100   | 1.2988610  |
| H    | 6.3388250   | 2.3520220   | 0.7660220  |
| H    | 5.0259040   | 2.4201750   | -0.4278320 |
| 15 C | 5.7678280   | -0.06067201 | 8.744970   |
| H    | 5.8352820   | -1.15341301 | 8.945830   |
| H    | 6.7589580   | 0.3413860   | 2.1207950  |
| H    | 5.0722990   | 0.2507090   | 2.6634500  |
| C    | 6.3019980   | -0.0114080  | -0.5784070 |
| 20 H | 6.3774170   | -1.1033900  | -0.6128730 |
| H    | 5.9967150   | 0.3388620   | -1.5720370 |
| H    | 7.3036710   | 0.3678250   | -0.3732470 |
| C    | 1.4721520   | -4.12828700 | 9.077600   |
| H    | 0.4862720   | -3.68322700 | 7.417240   |
| 25 H | 1.3679820   | -5.22053900 | 8.887460   |
| H    | 1.8168020   | -3.83920501 | 9.086150   |
| C    | 1.9522130   | -4.1150560  | -1.5509600 |
| H    | 0.9746180   | -3.6712460  | -1.7613630 |
| H    | 2.6457370   | -3.8143690  | -2.3464750 |
| 30 H | 1.8529100   | -5.2073210  | -1.5843960 |
| C    | 3.8152140   | -4.35251500 | 0.875370   |
| H    | 4.5635860   | -4.0823860  | -0.6669160 |
| H    | 4.2169430   | -4.10429301 | 0.769760   |
| H    | 3.6859130   | -5.44120800 | 0.483070   |
| 35 O | -0.32688201 | 6.602180    | -0.8473950 |
| C    | -0.25962002 | 9.155790    | -0.4478970 |
| C    | -1.23280003 | 8.458030    | -0.8890400 |
| C    | 0.7462960   | 3.4002070   | 0.4216120  |
| C    | -1.19959205 | 1.759790    | -0.4799900 |
| 40 H | -2.01346303 | 4.940760    | -1.5607850 |
| C    | 0.7698170   | 4.7343470   | 0.8234000  |
| H    | 1.5129360   | 2.7048500   | 0.7595140  |
| C    | -0.20006105 | 6.388530    | 0.3817120  |
| H    | -1.96525305 | 8.617360    | -0.8397100 |
| 45 H | 1.5600600   | 5.0723260   | 1.4923130  |
| I    | -2.79047300 | 2.191620    | -0.2289970 |
| C    | -4.5672820  | -0.85191300 | 2.248120   |
| C    | -4.6078120  | -2.23561900 | 0.413580   |
| C    | -5.6870310  | -0.16912400 | 7.041040   |
| 50 C | -5.7782030  | -2.93537400 | 3.387000   |
| H    | -3.7368090  | -2.7682560  | -0.3299150 |
| C    | -6.8519530  | -0.87911300 | 9.988540   |
| H    | -5.65679400 | 9.071420    | 0.8481480  |
| C    | -6.9015930  | -2.26116600 | 8.171930   |
| 55 H | -5.8068430  | -4.01257900 | 1.944090   |
| H    | -7.7222580  | -0.34480901 | 3.718500   |
| H    | -0.17705206 | 6.783390    | 0.6992000  |
| H    | -7.8108670  | -2.80996101 | 0.476270   |

## Complex E'(1)

|      |            |            |            |
|------|------------|------------|------------|
| Cu   | 0.2810990  | 0.0378300  | 0.0462740  |
| O    | -1.0695640 | 1.5783820  | 0.2809900  |
| C    | -2.3341800 | 1.5176870  | 0.2078490  |
| 5 C  | -3.0747990 | 0.4142310  | -0.2549420 |
| C    | -3.0651220 | 2.8000130  | 0.6704020  |
| C    | -2.5532910 | -0.8070700 | -0.7553120 |
| O    | -1.3321470 | -1.1079090 | -0.8143940 |
| C    | -3.5693730 | -1.8588360 | -1.2648090 |
| 10 C | 1.4826780  | -1.1412390 | 1.2869060  |
| C    | 2.5889520  | -0.3679250 | 1.7183640  |
| C    | 0.2275100  | -1.0049110 | 1.9327140  |
| C    | 2.4327940  | 0.5309890  | 2.7585780  |
| H    | 3.5531110  | -0.4866080 | 1.2340570  |
| 15 C | 0.1087660  | -0.0854710 | 2.9994060  |
| H    | -0.5805090 | -1.7000030 | 1.7242820  |
| C    | 1.1923620  | 0.6721760  | 3.4070170  |
| H    | 3.2841040  | 1.1273940  | 3.0766310  |
| H    | -0.8490440 | 0.043740   | 3.5053310  |
| 20 H | 1.0895700  | 1.3698270  | 4.2337920  |
| I    | 1.8931060  | -2.8980410 | 1.1341580  |
| H    | -4.1521970 | 0.5124150  | -0.2599840 |
| C    | -2.8351810 | -3.0818780 | -1.8161500 |
| H    | -2.2085840 | -3.5535450 | -1.0522010 |
| 25 H | -3.5666380 | -3.8211560 | -2.1659970 |
| H    | -2.1876010 | -2.8152460 | -2.6583900 |
| C    | -4.4678780 | -2.3044860 | -0.0999970 |
| H    | -5.0579560 | -1.4751050 | 0.3039870  |
| H    | -5.1660490 | -3.0799090 | -0.4413610 |
| 30 H | -3.8711980 | -2.7262460 | 0.7183890  |
| C    | -4.4364200 | -1.2604910 | -2.3834470 |
| H    | -3.8163200 | -0.9041110 | -3.2151510 |
| H    | -5.1182760 | -2.0261610 | -2.7757960 |
| C    | -5.0443830 | -0.4202850 | -2.0323360 |
| 35 H | -4.5908400 | 2.7302260  | 0.5847420  |
| H    | -4.9380100 | 2.5703550  | -0.4428910 |
| H    | -5.0023710 | 1.9339350  | 1.2163110  |
| H    | -5.0176180 | 3.6795430  | 0.9321780  |
| C    | -2.6659450 | 3.0683360  | 2.1292970  |
| 40 H | -1.5792750 | 3.1513640  | 2.2268170  |
| H    | -3.1197570 | 4.0043810  | 2.4790070  |
| H    | -3.0092840 | 2.2605550  | 2.7884180  |
| C    | -2.5747300 | 3.9601110  | -0.2091090 |
| H    | -3.0202100 | 4.9046400  | 0.1285260  |
| 45 H | -1.4854350 | 4.0519070  | -0.1600190 |
| H    | -2.8602490 | 3.8079500  | -1.2578210 |
| O    | 1.4672260  | 0.5179070  | -1.4979840 |
| C    | 2.2719590  | 1.5447520  | -1.5329020 |
| C    | 2.2660570  | 2.5714790  | -0.5486460 |
| 50 C | 3.2144740  | 1.6945860  | -2.5886750 |
| C    | 3.1353570  | 3.6568120  | -0.6202440 |
| H    | 1.5527200  | 2.4904660  | 0.2700230  |
| C    | 4.0780310  | 2.7846220  | -2.6491160 |
| H    | 3.2448140  | 0.9267730  | -3.3605020 |
| 55 C | 4.0537350  | 3.7820270  | -1.6679770 |
| H    | 3.0939480  | 4.4205200  | 0.1558420  |
| H    | 4.7826100  | 2.8577830  | -3.4768920 |
| H    | 4.7299820  | 4.6318180  | -1.7191490 |

TS'1 (1)

Negative frequency: -62,7 cm<sup>-1</sup>

|      |             |             |            |
|------|-------------|-------------|------------|
| Cu   | -0.65314300 | 1417300     | -0.3756080 |
| O    | 0.2855000   | -0.53486301 | 4.075160   |
| 5 C  | 1.4668210   | -0.98232001 | 4.979850   |
| C    | 2.4068740   | -1.02160200 | 4.491100   |
| C    | 1.8504260   | -1.51415402 | 8.986920   |
| C    | 2.2208600   | -0.5541480  | -0.8741660 |
| O    | 1.1699600   | -0.0201570  | -1.3237810 |
| 10 C | 3.4041270   | -0.7026010  | -1.8596840 |
| C    | -2.6567100  | -0.3018330  | -0.0082680 |
| C    | -2.7926080  | -0.49662401 | 3.729630   |
| C    | -3.53975200 | 5.314100    | -0.7082150 |
| C    | -3.77031700 | 2.182380    | 2.0627140  |
| 15 H | -2.1196790  | -1.16606101 | 8.977030   |
| C    | -4.51396301 | 2.307600    | -0.0004530 |
| H    | -3.45620800 | 6.447410    | -1.7843580 |
| C    | -4.63348601 | 0.795430    | 1.3826820  |
| H    | -3.86005700 | 0.906760    | 3.1389480  |
| 20 H | -5.18741501 | 8.935980    | -0.5386410 |
| H    | -5.40308201 | 6.213290    | 1.9260070  |
| I    | -1.7868040  | -2.0488750  | -1.2273600 |
| H    | 3.3764340   | -1.44594500 | 6.726930   |
| C    | 3.0271700   | -0.1359530  | -3.2293660 |
| 25 H | 2.7811080   | 0.9293200   | -3.1690100 |
| H    | 3.8717110   | -0.2541610  | -3.9197000 |
| H    | 2.1613880   | -0.6547770  | -3.6539900 |
| C    | 4.6263400   | 0.0631200   | -1.3292920 |
| H    | 4.9832860   | -0.3375660  | -0.3747200 |
| 30 H | 5.4502810   | -0.0060030  | -2.0513180 |
| H    | 4.3931570   | 1.1251430   | -1.1849700 |
| C    | 3.7575500   | -2.1896330  | -2.0207860 |
| H    | 4.0946600   | -2.6377380  | -1.0801630 |
| H    | 2.8937310   | -2.7632340  | -2.3790230 |
| 35 H | 4.5653710   | -2.3023750  | -2.7553780 |
| C    | 1.6809430   | -0.35853303 | 8.965150   |
| H    | 0.6630330   | 0.0412940   | 3.8583010  |
| H    | 1.8807960   | -0.70859004 | 9.172620   |
| H    | 2.3798040   | 0.4587820   | 3.6769770  |
| 40 C | 0.8686140   | -2.63986603 | 2.561070   |
| H    | -0.1646780  | -2.28129403 | 2.193590   |
| H    | 0.9645660   | -3.48349502 | 5.606820   |
| H    | 1.0714250   | -3.01155604 | 2.685470   |
| C    | 3.2778920   | -2.05317503 | 0.0085770  |
| 45 H | 3.4492820   | -2.90416802 | 3.386990   |
| H    | 4.0263750   | -1.28320902 | 7.869340   |
| H    | 3.4566020   | -2.40063104 | 0.339360   |
| O    | -0.95896902 | 1.248020    | -0.5903310 |
| C    | -0.11919603 | 0.702840    | -0.2589050 |
| 50 C | -0.34662904 | 4.123130    | -0.6728010 |
| C    | 1.0419510   | 2.8449270   | 0.5295350  |
| C    | 0.5179580   | 5.4442840   | -0.3193650 |
| H    | -1.22763704 | 6.176170    | -1.2792740 |
| C    | 1.8992300   | 3.8863030   | 0.8757970  |
| 55 H | 1.2483990   | 1.8289850   | 0.8582970  |
| C    | 1.6541970   | 5.1990880   | 0.4593870  |
| H    | 0.3020550   | 6.4571070   | -0.6578900 |
| H    | 2.7773680   | 3.6681200   | 1.4831350  |
| H    | 2.3280240   | 6.0070610   | 0.7338370  |

## Complex F' (1)

|      |            |             |            |
|------|------------|-------------|------------|
| Cu   | -0.6353570 | -0.3458880  | -0.5785570 |
| O    | 0.2120980  | 0.5041970   | 1.2207900  |
| C    | 1.4302030  | 0.4224700   | 1.5447680  |
| 5 C  | 2.4542550  | -0.07437300 | 0.7103930  |
| C    | 1.7641750  | 0.9229690   | 2.9676310  |
| C    | 2.2914260  | -0.5296430  | -0.6106830 |
| O    | 1.1932940  | -0.6118640  | -1.2404030 |
| C    | 3.5480000  | -0.9793730  | -1.3869500 |
| 10 I | -0.8980020 | -2.83851700 | 0.0812440  |
| C    | -2.4828820 | -0.1801030  | -0.1111380 |
| C    | -3.4712720 | -0.4431230  | -1.0525530 |
| C    | -2.7870090 | 0.3189940   | 1.1469070  |
| C    | -4.8038940 | -0.1844980  | -0.7238330 |
| 15 H | -3.2191190 | -0.8308600  | -2.0357480 |
| C    | -4.1274640 | 0.5768510   | 1.4636430  |
| H    | -1.9985340 | 0.5136430   | 1.8681860  |
| C    | -5.1348360 | 0.3252620   | 0.5342480  |
| H    | -5.5828820 | -0.3824060  | -1.4571850 |
| 20 H | -4.3749560 | 0.9727090   | 2.4466150  |
| H    | -6.1737530 | 0.5229300   | 0.7867490  |
| H    | 3.4618800  | -0.0819980  | 1.1031600  |
| C    | 3.1765120  | -1.4182320  | -2.8044080 |
| H    | 2.7145390  | -0.6029320  | -3.3708560 |
| 25 H | 4.0828140  | -1.7340030  | -3.3354500 |
| H    | 2.4746620  | -2.2583290  | -2.7938660 |
| C    | 4.5533520  | 0.1792840   | -1.4750170 |
| H    | 4.1134510  | 1.0458530   | -1.9834440 |
| H    | 4.8970980  | 0.5042700   | -0.4877240 |
| 30 H | 5.4327430  | -0.1380740  | -2.0497860 |
| C    | 4.1913080  | -2.1681750  | -0.6543960 |
| H    | 4.5423370  | -1.8939240  | 0.3457860  |
| H    | 3.4807070  | -2.9970320  | -0.5494900 |
| H    | 5.0540250  | -2.5316180  | -1.2269520 |
| 35 C | 3.2430700  | 0.8194260   | 3.3443520  |
| H    | 3.6014380  | -0.2164600  | 0.3213210  |
| H    | 3.8791690  | 1.4205930   | 2.6840050  |
| H    | 3.3829290  | 1.1936390   | 4.3661310  |
| C    | 0.9404100  | 0.0863270   | 3.9585550  |
| 40 H | 1.1098110  | 0.4429510   | 4.9822510  |
| H    | -0.1288580 | 0.1609620   | 3.7380580  |
| H    | 1.2264490  | -0.9723220  | 0.9169680  |
| C    | 1.3289150  | 2.3930930   | 3.0600190  |
| H    | 1.4917130  | 2.7695230   | 4.0776590  |
| 45 H | 1.9065990  | 3.0212000   | 2.3702240  |
| H    | 0.2681080  | 2.5003070   | 2.8149210  |
| O    | -0.9750260 | 1.0638780   | -1.8581670 |
| C    | -0.6176670 | 0.3009140   | -1.5415720 |
| C    | 0.6844780  | 2.7768890   | -1.8164850 |
| 50 C | -1.5434800 | 0.2084290   | -0.9772170 |
| C    | 1.0341730  | 4.0989740   | -1.5553040 |
| H    | 1.4047260  | 2.0837500   | -2.2437430 |
| C    | -1.1834860 | 0.5275580   | -0.7154400 |
| H    | -2.5457210 | 0.8513730   | -0.7525510 |
| 55 C | 0.1062780  | 4.9854340   | -1.0011830 |
| H    | 2.0413280  | 4.4422650   | -1.7848690 |
| H    | -1.9163600 | 0.52074300  | -0.2847660 |
| H    | 0.3828060  | 6.0169120   | -0.7971700 |



## Complex C' (1)

|      |             |             |            |
|------|-------------|-------------|------------|
| Cu   | -0.28951400 | 0.1633560   | -0.3983110 |
| O    | 0.9841900   | 1.2804080   | 0.0781970  |
| C    | 2.2464790   | 1.0597580   | 0.2329910  |
| 5 C  | 2.8790420   | -0.16929200 | 0.0974140  |
| C    | 3.0211790   | 2.3314070   | 0.6037000  |
| C    | 2.2172680   | -1.3757600  | -0.2208840 |
| O    | 0.9717440   | -1.4615990  | -0.4336070 |
| C    | 3.0282480   | -2.6733300  | -0.3204240 |
| 10 H | 3.9469570   | -0.20983200 | 0.2565870  |
| C    | 2.1155080   | -3.8515820  | -0.6630970 |
| H    | 1.6090040   | -3.7035600  | -1.6222680 |
| H    | 2.7170900   | -4.7653840  | -0.7309720 |
| H    | 1.3482280   | -4.00336100 | 0.1029940  |
| 15 C | 4.0892470   | -2.5183130  | -1.4230460 |
| H    | 4.7996140   | -1.7149170  | -1.2030090 |
| H    | 4.6559570   | -3.4527240  | -1.5135920 |
| H    | 3.6243710   | -2.3088630  | -2.3934490 |
| C    | 3.7171600   | -2.9438020  | 0.0277860  |
| 20 H | 4.4259410   | -2.1538770  | 0.2962920  |
| H    | 2.9828460   | -3.0348470  | 0.8366280  |
| H    | 4.2731100   | -3.88709300 | 0.9675050  |
| C    | 2.8160090   | 3.3566850   | -0.5237160 |
| H    | 1.7546040   | 3.5788500   | -0.6673780 |
| 25 H | 3.3338640   | 4.2889610   | -0.2695680 |
| H    | 3.2258170   | 2.9892650   | -1.4723390 |
| C    | 2.4283880   | 2.8812390   | 1.9114700  |
| H    | 1.3620520   | 3.0982780   | 1.8005870  |
| H    | 2.5543560   | 2.1667750   | 2.7340370  |
| 30 H | 2.9451080   | 3.8082810   | 2.1860470  |
| C    | 4.5198360   | 2.0939380   | 0.7966540  |
| H    | 4.7238960   | 1.3865700   | 1.6086410  |
| H    | 5.0000430   | 1.7260260   | -0.1172970 |
| H    | 4.9982550   | 3.0441750   | 1.0603980  |
| 35 O | -1.6446340  | -1.0812920  | -0.9339950 |
| C    | -2.6476280  | -1.4526120  | -0.1341660 |
| C    | -3.8998070  | -1.7259370  | -0.7163930 |
| C    | -2.4957640  | -1.6390740  | 0.2521010  |
| C    | -4.9548570  | -2.19104300 | 0.0638240  |
| 40 H | -4.0193850  | -1.5750740  | -1.7863540 |
| C    | -3.5632320  | -2.0869960  | 0.0263700  |
| H    | -1.5324000  | -1.4303720  | 0.7143000  |
| C    | -4.7986180  | -2.3713060  | 0.4402460  |
| H    | -5.9118290  | -2.4045360  | -0.4073340 |
| 45 H | -3.4253680  | -2.2203930  | 0.0970830  |
| H    | -5.6277790  | -2.7245320  | 0.0473870  |
| C    | -1.5818290  | 0.4079130   | -0.4444260 |
| C    | -2.0306780  | 0.8644730   | -1.6736720 |
| C    | -1.9818600  | 0.9664940   | 0.7593170  |
| 50 C | -2.9138280  | 0.9499780   | -1.6924130 |
| H    | -1.7203940  | 0.3953270   | -2.6033450 |
| C    | -2.8757090  | 0.0434770   | 0.7225560  |
| H    | -1.6161590  | 0.5944780   | 0.7129200  |
| C    | -3.3371460  | 0.5342300   | -0.4984700 |
| 55 H | -3.2751720  | 0.3264130   | -2.6465410 |
| H    | -3.2019300  | 0.4965510   | 0.6557730  |
| H    | -4.0296510  | 0.3716790   | -0.5198200 |

TS2' (1)

Negative frequency: -305,3 cm<sup>-1</sup>

|      |             |             |            |
|------|-------------|-------------|------------|
| Cu   | -0.31644900 | 1.122170    | -0.4335000 |
| O    | 1.0506650   | 1.3198060   | 0.0788750  |
| 5 C  | 2.2862010   | 1.0140270   | 0.2496390  |
| C    | 2.8340160   | -0.26194900 | 1.001520   |
| C    | 3.1574800   | 2.2122610   | 0.6574630  |
| C    | 2.1243670   | -1.4317530  | -0.2601340 |
| O    | 0.8811600   | -1.4677480  | -0.4993800 |
| 10 C | 2.8965530   | -2.7562010  | -0.3734170 |
| C    | -1.8260790  | 1.3391940   | -0.4735930 |
| C    | -1.8714500  | 2.1788620   | -1.5816440 |
| C    | -2.3931180  | 1.6624240   | 0.7517090  |
| C    | -2.4454750  | 3.4396650   | -1.4170630 |
| 15 H | -1.4694340  | 1.8683210   | -2.5418940 |
| C    | -2.9635390  | 2.9318790   | 0.8883760  |
| H    | -2.3852240  | 0.9644140   | 1.5848840  |
| C    | -2.9896680  | 3.8193200   | -0.1871230 |
| H    | -2.4752400  | 4.1215680   | -2.2634040 |
| 20 H | -3.3916620  | 3.2172840   | 1.8462050  |
| H    | -3.4449000  | 4.7992820   | -0.0729730 |
| H    | 3.8951470   | -0.3704600  | 0.2766300  |
| C    | 1.9504660   | -3.8935480  | -0.7618250 |
| H    | 1.4730960   | -3.7076470  | -1.7294290 |
| 25 H | 2.5186290   | -4.8285390  | -0.8344880 |
| H    | 1.1589790   | -4.0311400  | -0.0178300 |
| C    | 3.9860260   | -2.6212480  | -1.4501040 |
| H    | 3.5498720   | -2.3704970  | -2.4243660 |
| H    | 4.7224990   | -1.8513880  | -1.1979000 |
| 30 H | 4.5182350   | -3.5748220  | -1.5533310 |
| C    | 3.5466040   | -3.0861890  | 0.9805610  |
| H    | 4.2784880   | -2.3300440  | 1.2827280  |
| H    | 2.7924800   | -3.1664810  | 1.7725070  |
| H    | 4.0678980   | -4.0488260  | 0.9113030  |
| 35 C | 3.0227150   | 3.2892540   | -0.4311340 |
| H    | 1.9778400   | 3.5842120   | -0.5648890 |
| H    | 3.6002150   | 4.1770000   | -0.1465360 |
| H    | 3.4071660   | 2.9295560   | -1.3935080 |
| C    | 2.6076160   | 2.7590880   | 1.9850840  |
| 40 H | 1.5556910   | 3.0429950   | 1.8865080  |
| H    | 2.6918360   | 2.0134180   | 2.7852300  |
| H    | 3.1799850   | 3.6447900   | 2.2859760  |
| C    | 4.6373410   | 1.8704500   | 0.8366030  |
| H    | 4.7969130   | 1.1313090   | 1.6302260  |
| 45 H | 5.0873520   | 1.4913610   | -0.0883830 |
| H    | 5.1823930   | 2.7786240   | 1.1199190  |
| O    | -1.9982040  | -0.4871780  | -1.0170450 |
| C    | -2.8131820  | -1.2081260  | -0.2070060 |
| C    | -4.1672880  | -1.2932540  | -0.5591140 |
| 50 C | -2.3461670  | -1.8854960  | 0.9259730  |
| C    | -5.0346690  | -2.0720660  | 0.2020010  |
| H    | -4.5176650  | -0.7534930  | -1.4348090 |
| C    | -3.2253540  | -2.6542470  | 1.6872100  |
| H    | -1.2944120  | -1.8193910  | 1.1971000  |
| 55 C | -4.5703730  | -2.7537100  | 1.3294240  |
| H    | -6.0814470  | -2.1411770  | -0.0836560 |
| H    | -2.8533270  | -3.1803330  | 0.5628960  |
| H    | -5.2518820  | -3.3550690  | 1.9249700  |

### Complex D' (1)

|      |             |             |            |
|------|-------------|-------------|------------|
| Cu   | 0.1068480   | -0.0322630  | -0.0010760 |
| O    | -1.19761101 | 4.597870    | 0.0005800  |
| C    | -2.45553901 | 2.505110    | 0.0011210  |
| 5 C  | -3.0728640  | -0.01320700 | 0.0006740  |
| C    | -3.30918502 | 5.345220    | 0.0021960  |
| C    | -2.4532250  | -1.2849430  | -0.0009880 |
| O    | -1.2024420  | -1.4998840  | -0.0021640 |
| C    | -3.3641900  | -2.5304570  | -0.0014160 |
| 10 H | -4.1543640  | -0.02080000 | 0.014710   |
| C    | -2.5218300  | -3.8074000  | -0.0055070 |
| H    | -1.8772450  | -3.86797500 | 0.8775580  |
| H    | -3.1858300  | -4.6802940  | -0.0053830 |
| H    | -1.8814910  | -3.8650360  | -0.8918750 |
| 15 C | -4.2481710  | -2.52482601 | 2.567200   |
| H    | -4.9187760  | -1.65979101 | 2.867260   |
| H    | -4.8679060  | -3.43017301 | 2.766370   |
| H    | -3.6379100  | -2.51362702 | 1.678650   |
| C    | -4.2539330  | -2.5207370  | -1.2554160 |
| 20 H | -4.9254550  | -1.6562270  | -1.2792280 |
| H    | -3.6478910  | -2.5056650  | -2.1693170 |
| H    | -4.8730370  | -3.4264970  | -1.2758520 |
| C    | -2.93748303 | 3.428300    | 1.2553840  |
| H    | -1.86517303 | 5.594280    | 1.2770570  |
| 25 H | -3.48430804 | 2.938220    | 1.2627370  |
| H    | -3.19826602 | 7.960440    | 2.1702600  |
| C    | -2.93881903 | 3.438260    | -1.2507740 |
| H    | -1.86653903 | 5.604820    | -1.2733830 |
| H    | -3.20053302 | 7.977190    | -2.1657900 |
| 30 H | -3.48569904 | 2.947960    | -1.2568270 |
| C    | -4.81954302 | 2.920660    | 0.0028950  |
| H    | -5.14940601 | 7.427360    | -0.8867580 |
| H    | -5.14848501 | 7.419180    | 0.8923850  |
| H    | -5.33879203 | 2.582060    | 0.0036040  |
| 35 O | 2.1348330   | 0.0423260   | -0.0008090 |
| C    | 2.8014980   | -1.18934100 | 0.0004970  |
| C    | 3.0981000   | -1.7930220  | -1.2152910 |
| C    | 3.0997120   | -1.78965701 | 2.175610   |
| C    | 3.7149720   | -3.0436830  | -1.2066260 |
| 40 H | 2.8448560   | -1.2922750  | -2.1454490 |
| C    | 3.7166320   | -3.04031301 | 2.115240   |
| H    | 2.8477230   | -1.28635002 | 1.466770   |
| C    | 4.0243280   | -3.66684000 | 0.0031100  |
| H    | 3.9505680   | -3.5311400  | -2.1486590 |
| 45 H | 3.9534840   | -3.52515202 | 1.545930   |
| H    | 4.5029270   | -4.64222700 | 0.0041370  |
| C    | 2.8832220   | 1.2178080   | -0.0011880 |
| C    | 4.2742520   | 1.2132550   | -0.0020110 |
| C    | 2.1596840   | 2.4075250   | -0.0007730 |
| 50 C | 4.9476900   | 2.4364450   | -0.0024390 |
| H    | 4.8300260   | 0.2813920   | -0.0023360 |
| C    | 2.8485820   | 3.6173220   | -0.0012020 |
| H    | 1.0714660   | 2.3786450   | -0.0001320 |
| C    | 4.2445310   | 3.6390730   | -0.0020510 |
| 55 H | 6.0344650   | 2.4383280   | -0.0030900 |
| H    | 2.2864750   | 4.5474560   | -0.0008830 |
| H    | 4.7777410   | 4.5855160   | -0.0023930 |

### Complex B'' (1)

|    |    |            |            |            |
|----|----|------------|------------|------------|
| 60 | Cu | -0.7534060 | -1.2645780 | -0.0854090 |
|    | O  | -3.0000220 | -1.5056980 | -0.0198350 |
|    | C  | -3.7766850 | -0.5196410 | 0.0202120  |
|    | C  | -3.3564570 | 0.8381350  | 0.0155130  |
| 65 | C  | -2.0421940 | 1.3197900  | -0.0258030 |
|    | O  | -0.9764690 | 0.6168620  | -0.0671300 |
|    | C  | -1.8323570 | 2.8517660  | -0.0230050 |
|    | O  | -0.1585020 | -3.0176940 | -0.1221170 |
|    | H  | -0.9745810 | -3.5395430 | -0.1028320 |
| 70 | H  | -4.1390450 | 1.5881730  | 0.0487360  |
|    | C  | -5.2992310 | -0.7940580 | 0.0791060  |
|    | C  | -5.5641070 | -2.2999600 | 0.0847050  |
|    | H  | -5.0962140 | -2.7865340 | 0.9470490  |
|    | H  | -6.6448820 | -2.4826740 | 0.1321780  |
| 75 | H  | -5.1750590 | -2.7800360 | -0.8194830 |
|    | C  | -5.9854510 | -0.1742530 | -1.1483260 |
|    | H  | -7.0597850 | -0.3987400 | -1.1282190 |
|    | H  | -5.8713830 | 0.9145050  | -1.1783640 |
|    | H  | -5.5733310 | -0.5834850 | -2.0789060 |
| 80 | C  | -5.8875290 | -0.1830040 | 1.3607330  |
|    | H  | -6.9588720 | -0.4128950 | 1.4254190  |
|    | H  | -5.4003490 | -0.5942620 | 2.2534090  |

---

|    |   |            |            |            |
|----|---|------------|------------|------------|
|    | H | -5.7772050 | 0.9061850  | 1.3871860  |
|    | C | -0.3419930 | 3.1958400  | -0.0596300 |
|    | H | 0.1421370  | 2.8020320  | -0.9591440 |
|    | H | -0.2222520 | 4.2864430  | -0.0563850 |
| 5  | H | 0.1875710  | 2.7914120  | 0.8091430  |
|    | C | -2.4429960 | 3.4586670  | 1.2506380  |
|    | H | -3.5243140 | 3.2962600  | 1.3071920  |
|    | H | -1.9878710 | 3.0266080  | 2.1501320  |
|    | H | -2.2644950 | 4.5414610  | 1.2688390  |
| 10 | C | -2.5083780 | 3.4683650  | -1.2585870 |
|    | H | -2.3301770 | 4.5512060  | -1.2787450 |
|    | H | -2.1021120 | 3.0422550  | -2.1839850 |
|    | H | -3.5913630 | 3.3065420  | -1.2586070 |
|    | I | 2.3636760  | -0.6501190 | -0.0114550 |
| 15 | C | 4.4171700  | -0.0601370 | 0.0300370  |
|    | C | 4.7472160  | 1.2947490  | -0.0170320 |
|    | C | 5.4135670  | -1.0341460 | 0.1024470  |
|    | C | 6.0905150  | 1.6737060  | 0.0078720  |
|    | H | 3.9694750  | 2.0512230  | -0.0730570 |
| 20 | C | 6.7533760  | -0.6430420 | 0.1268830  |
|    | H | 5.1542470  | -2.0883980 | 0.1394810  |
|    | C | 7.0949780  | 0.7085200  | 0.0797520  |
|    | H | 6.3478780  | 2.7294160  | -0.0292630 |
|    | H | 7.5298300  | -1.4020350 | 0.1830300  |
| 25 | H | 8.1393890  | 1.0083980  | 0.0987240  |

## References

- [1] a) M. J. Frisch, *et al.* Gaussian 09, revision A.02; Gaussian, Inc ; Wallingford, CT, 2009; b) C. Adamo, V. J. Barone, *Chem. Phys.*, 1999, **110**, 6158; c) J. P. Perdew, K. Burke, M. Ernzerhof, *Phys. Rev. Lett.*, 1996, **77**, 3865; d) R. Krishnan, J. S. Binkley, R. Seeger, J. A. J. Pople, *Chem. Phys.*, 1980, **72**, 650; e) T. Clark, J. Chandrasekhar, G. W. Spitznagel, P. V. R. J. Schleyer, *Comput. Chem.*, 1983, **4**, 294; f) L. v. Szentpaly, P. Fuentealba, H. Preuss, H. Stoll, *Chem. Phys. Lett.*, 1982, **93**, 555; g) W. Kuchle, M. Dolg, H. Stoll, H. Preuss, *J. Chem. Phys.*, 1994, **100**, 7535. h) J. Tomasi, B. Mennucci, R. Cammi, *Chem. Rev.*, 2005, **105**, 2999.
